# Supplementary material for: PARK2 and proinflammatory/anti-inflammatory cytokine gene interactions contribute to the susceptibility to leprosy: a case–control study of North Indian population
Source: PubMed Central journal article supplement — BMJ Open. 2014 Feb 26;4(2):e004239. doi: 10.1136/bmjopen-2013-004239 (PMC3939656; doi:10.1136/bmjopen-2013-004239), 2014-02-26
Supplement: bmjopen-2013-004239.draft_revisions.pdf [file bmjopen-2013-004239.draft_revisions.pdf]

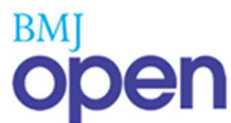

**PARK2 and pro-/anti- inflammatory cytokine gene interactions contribute to the susceptibility to Leprosy**

|                                 |                                                                                                                                                                                                                                                                                                                                                                                                                                                                                                                                                                                                                                                                                                                                                             |
|---------------------------------|-------------------------------------------------------------------------------------------------------------------------------------------------------------------------------------------------------------------------------------------------------------------------------------------------------------------------------------------------------------------------------------------------------------------------------------------------------------------------------------------------------------------------------------------------------------------------------------------------------------------------------------------------------------------------------------------------------------------------------------------------------------|
| Journal:                        | <i>BMJ Open</i>                                                                                                                                                                                                                                                                                                                                                                                                                                                                                                                                                                                                                                                                                                                                             |
| Manuscript ID:                  | bmjopen-2013-004239                                                                                                                                                                                                                                                                                                                                                                                                                                                                                                                                                                                                                                                                                                                                         |
| Article Type:                   | Research                                                                                                                                                                                                                                                                                                                                                                                                                                                                                                                                                                                                                                                                                                                                                    |
| Date Submitted by the Author:   | 15-Oct-2013                                                                                                                                                                                                                                                                                                                                                                                                                                                                                                                                                                                                                                                                                                                                                 |
| Complete List of Authors:       | Chopra, Rupali; Shri Mata Vaishno Devi University, School of Biotechnology,<br>Kalaiarasan, Ponnusamy; Shri Mata Vaishno Devi University, School of Biotechnology,<br>Ali, Shafat; NCAHG, School of Life Sciences, Jawaharlal Nehru university<br>Srivastava, Amit; NCAHG, School of Life Sciences, Jawaharlal Nehru university<br>Aggarwal, Shweta; NCAHG, School of Life Sciences, Jawaharlal Nehru university<br>Garg, Vijay; Maulana Azad Medical College, Lok Nayak Jai Prakash Hospital, Department of Dermatology and Sexually Transmitted Diseases<br>Bhattacharya, S.; University College of Medical Sciences and GTB Hospital, Department of Dermatology and Venereology<br>Bamezai, Ramesh; JAWAHARLAL NEHRU UNIVERSITY, SCHOOL OF LIFE SCIENCES |
| <b>Primary Subject Heading</b>: | Genetics and genomics                                                                                                                                                                                                                                                                                                                                                                                                                                                                                                                                                                                                                                                                                                                                       |
| Secondary Subject Heading:      | Infectious diseases                                                                                                                                                                                                                                                                                                                                                                                                                                                                                                                                                                                                                                                                                                                                         |
| Keywords:                       | PARK2, pro-/anti- inflammatory cytokine genes, Leprosy, Gene interaction                                                                                                                                                                                                                                                                                                                                                                                                                                                                                                                                                                                                                                                                                    |
|                                 |                                                                                                                                                                                                                                                                                                                                                                                                                                                                                                                                                                                                                                                                                                                                                             |

SCHOLARONE™  
Manuscripts

1  
2  
3  
4  
5  
6  
7  
8  
9  
10  
11  
12  
13  
14  
15  
16  
17  
18  
19  
20  
21  
22  
23  
24  
25  
26  
27  
28  
29  
30  
31  
32  
33  
34  
35  
36  
37  
38  
39  
40  
41  
42  
43  
44  
45  
46  
47  
48  
49  
50  
51  
52  
53  
54  
55  
56  
57  
58  
59  
60

## Title: PARK2 and pro-/anti- inflammatory cytokine gene interactions contribute to the susceptibility to Leprosy

Rupali Chopra 1, Ponnusamy Kalaiarasan 1, Shafat Ali 2, Amit K. Srivastava 2, Shweta Aggarwal 2, Vijay K. Garg 3, Sambit N. Bhattacharya 4, Rameshwar N. K. Bamezai 2 \*

1 Shri Mata Vaishno Devi University, School of Biotechnology, Katra, Jammu & Kashmir, 182320, India

2 National Centre of Applied Human Genetics, School of life Sciences, Jawaharlal Nehru University, New Delhi, 110067, India.

3 Department of Dermatology and Sexually Transmitted Diseases, Maulana Azad Medical College, Lok Nayak Jai Prakash Hospital, New Delhi, 110002, India.

4 Department of Dermatology and Venereology, University College of Medical Sciences and GTB Hospital, Delhi, 110095, India.

\*Corresponding author: e-mail address: [bamezai@hotmail.com](mailto:bamezai@hotmail.com), Postal address: Lab No-332, NCAHG, School of Life Sciences, JNU, New Delhi-110067, India. Phone No. 011-26742211.

### Abstract

**Objectives:** Cytokines and related molecules in immune-response pathways seem important in deciding the outcome of the host-pathogen interactions towards different polar forms in Leprosy. Here we study the role of significantly associated and functionally important SNPs in these genes, published independently from our research group, through combined interaction with an additional analysis of the *in-silico* network outcome, to understand how these impact the susceptibility towards the disease, leprosy.

**Design:** The study was designed to assess an overall combined contribution of significantly associated individual SNPs to reflect on epistatic interactions and their outcome in the form of the disease, leprosy. Further *in-silico* approach was adopted to carry out Protein-Protein interaction study between PARK2 and pro-/anti- inflammatory cytokines.

**Setting:** Population based case-control study involved the data of North India. Protein-Protein interaction networks were constructed using Cytoscape.

1  
2  
3 **Participants:** Study included 2305 Northern Indians samples (829 Leprosy Patients; 1476  
4 Healthy controls).  
5  
6

7 **Primary and secondary outcome measures:** For genotype interaction analysis, all possible  
8 genotype combinations between selected SNPs were used as an independent variable in a model  
9 using logistic regression with the forward likelihood ratio method, keeping the gender as a  
10 covariate.  
11  
12  
13

14 **Results:** Interaction analysis between PARK2 with significant SNPs of anti-/pro- inflammatory  
15 cytokine genes and the genes spanning the HLA region (6p21.3) i.e., BAT1 to BTNL2-DR in a  
16 case-control comparison, showed that combined interaction analysis of PARK2, TNF, BTNL2-  
17 DR, IL10, IL-6 & TGFBR2 increased the risk towards leprosy (OR=2.54) and PARK2, BAT1,  
18 NFKBIL1, LTA, TNF-LTB, IL12B & IL10RB provided increased protection (OR=0.26) in  
19 comparison to their individual contribution.  
20  
21  
22  
23  
24  
25  
26

27 **Conclusions:** The epistatic SNP-SNP interaction involving the PARK2 and cytokine genes  
28 provide an additive risk towards leprosy susceptibility. Further, *in-silico* Protein-Protein  
29 Interaction (PPI) of PARK2 and important pro-/anti inflammatory molecules indicate that  
30 PARK2 is central to immune regulation, regulating the production of different cytokines upon  
31 infection.  
32  
33  
34  
35  
36

37 **Keywords:** PARK2, pro-/anti- inflammatory cytokine genes, Leprosy, Gene interaction  
38  
39

## 40 **Article Summary**

41  
42 Strengths and limitation of this study

- 43  
44 • Many of the genetic studies lack replication in different population groups, explaining the  
45 heterogeneity in associated genes and genomic regions. This may be due to the complex  
46 nature of a disease. The complexity, however, could partly be delineated at genetic level  
47 by assessing the quantum of the contribution of different loci to the disease in a combined  
48 manner instead of their individual role.  
49
- 50 • Our study highlights the importance of a combined effect of the important cytokine and  
51 other immune regulatory genes, whose combined effect in diverse genotype  
52  
53  
54  
55  
56  
57  
58  
59  
60

1  
2  
3 combinations, provide either increased risk or protection towards the complex genetic  
4 disease, Leprosy.  
5

- 6  
7 • Genetic interaction and an additional in-silico pathway analysis provided an overall  
8 perspective on how PARK2 gene product; parkin, acts as a centrally placed molecule,  
9 playing an important role in regulating different pathways of the immune response and  
10 susceptibility to Leprosy. This conclusion needs further support with future experiments  
11 in vitro or in vivo of T cell responses in different genetic backgrounds of the identified  
12 networks in this study.  
13  
14  
15  
16  
17

## 18 **Introduction**

19  
20  
21  
22 Leprosy caused by *Mycobacterium leprae* is a chronic infectious disease, characterized by  
23 clinically defined polar forms in which pathology and immunology are inextricably related,  
24 providing a critical model to explore the immuno-regulatory mechanisms in humans. At one  
25 pole, tuberculoid form is associated with a strong cell mediated immunity and T helper 1 (Th1)  
26 cytokine profile and at the other end of the spectrum, the lepromatous form is associated with a  
27 strong humoral response and T helper 2 (Th2) cytokine profile. Cytokines and other related  
28 molecules of the immunological pathways thus seem to be a part of significant group of  
29 candidates that are apparently critical for the host-pathogen interactions, where the outcome of  
30 the disease is majorly dependent on the host factors controlling the immune response, especially  
31 when *M. leprae* possesses lowest level of genetic diversity [1]. This is supported by various  
32 studies of familial clustering [2], twin studies [3], complex segregation analysis [4 5], test of  
33 analysis with the HLA genes [6] including recent genome-wide association studies, [7 8] and  
34 studies of several genes that modulate cell-mediated immunity, with a role in either susceptibility  
35 to leprosy per se or to leprosy types [9]. Various candidate gene studies and genome-wide  
36 approaches have implicated polymorphisms in cytokine genes, whose protein products are part  
37 of important immune modulatory molecules, playing a major role in influencing host-pathogen  
38 interactions and determine the outcome of many infectious and autoimmune diseases [10-16].  
39 However, only a few observations have been replicated unequivocally in different population  
40 groups, suggesting the polygenic nature of the disease with a high degree of heterogeneity  
41 among different populations.  
42  
43  
44  
45  
46  
47  
48  
49  
50  
51  
52  
53  
54  
55  
56  
57  
58  
59  
60

1  
2  
3 We, in the recent past, have studied various candidate genes of pro-/anti-inflammatory cytokines  
4 in two independent population groups, North and East India-Orissa; and found strong  
5 association with IL-10, IL-10RB, TGFBR2, IL-6 [14], IL-12B [17]. Fine-mapping of a specific  
6  
7 association with IL-10, IL-10RB, TGFBR2, IL-6 [14], IL-12B [17]. Fine-mapping of a specific  
8  
9 6p (HLA) chromosomal region revealed a significant association of important candidates, BAT1,  
10 LTA, TNF and BTNL2 [16]. In a subsequent study of the 6q chromosomal region, involving the  
11 overlapping regulatory domain of PARK2-PACRG genes, revealed an involvement of significant  
12 SNPs and presence of a differential LD structure in Indian populations as compared to  
13 Vietnamese [18]. The latter observation and the functional role of PARK2, as a ubiquitin ligase,  
14 has recently been shown in providing resistance to intracellular pathogens [19] through ubiquitin  
15 mediated autophagy. Further the involvement of parkin in regulating production of cytokines  
16 upon infection [20], indeed provides strong hint for any functional variation in the gene having  
17 profound effect in modulating the expression of the immune-regulatory genes. The importance of  
18 all the studied genes [14-18] in the network of immune-response necessitated the analysis of an  
19 interaction between these genes as a whole to understand their contribution together towards the  
20 susceptibility of the complex disease, Leprosy; where the outcome of the infection in all  
21 probabilities depends on the nature of gene interactions between the genes with the potential of  
22 contributing to the immune pathology.  
23  
24  
25  
26  
27  
28  
29  
30  
31  
32  
33

34  
35 The aim, therefore, of this study was to assess an overall interaction between the significant and  
36 functionally important SNPs studied in a case-control comparison of the samples from New  
37 Delhi, in Northern India; where most of these SNPs were replicated in an unrelated East Indian-  
38 Orissa population. These included for an overall interaction the PARK2 gene significant SNPs  
39 [18] with the significant SNPs of anti-inflammatory cytokine genes (IL-10, IL-10RB, TGFBR2,  
40 IL-6) [14], pro-inflammatory cytokine genes (TNF-alpha, LT-alpha, IL-12B) and the genes  
41 spanning the HLA region of the chromosome 6p21.3 i.e., BAT1 to BTNL2-DR [16 17] to  
42 evaluate their combined contribution towards the outcome of the complex infectious disease;  
43 Leprosy.  
44  
45  
46  
47  
48  
49  
50  
51

## 52 53 **Methods**

54  
55 The study involved the revisit of our published work on individual candidate genes and regions,  
56 studied in North Indian population groups in case-control comparison. The data compiled was  
57  
58  
59  
60

1  
2  
3 from a group of 2305 samples from Northern India (including 829 Leprosy patients and 1476  
4 unrelated healthy control subjects from North India) [14 16-18] with a complete coverage of  
5 genes belonging to pro-, anti-inflammatory cytokines, selected HLA regions in 6p21.3 and  
6 common regulatory region of PARK2/PACRG genes located at 6q26 region. The patients' group  
7 was classified as pauci-bacillary (PB) or multi-bacillary (MB) according to the Ridley and  
8 Jopling criteria [21], including 421 Pauci-bacillary patients and 408 Multi-bacillary patients,  
9 with a mean age of  $32.30 \pm 3.2$  years (range 6-80 years). All these patients were under treatment  
10 with multidrug therapy (MDT) specific for multibacillary (MB) and paucibacillary (PB) leprosy,  
11 as recommended by the World Health Organization.  
12  
13  
14  
15  
16  
17  
18  
19

20 For genotype interaction analysis, all possible genotype combinations between selected SNPs  
21 (pairwise or multiple genes) were ascertained from a MassArray platform for the given  
22 genotypes of SNPs. These interactions were tested as an independent variable in a model using  
23 logistic regression with the forward likelihood ratio method, keeping the gender as a covariate. In  
24 this selection method, entry testing based on the significance of the score statistics and removal  
25 testing based on the probability of a likelihood ratio statistics was based on the maximum partial  
26 likelihood estimates. Furthermore, in multiple gene interaction analysis, all interactions with  
27 either risk or protective effect were combined against other interactions to observe an overall  
28 effect of the risk Vs protective interactions. These analyses were performed using statistical  
29 software package SPSS V.17.0 (SPSS, Chicago III, Illinois, USA) for Windows. *P* Value was  
30 considered significant at and below 0.05.  
31  
32  
33  
34  
35  
36  
37  
38  
39

40 *In-silico* approach to assess the network of the genes in a Protein-Protein Interaction (PPI) of  
41 PARK2, using Agile Protein Interaction Database (APID), a comprehensive resource for protein  
42 interaction data, automatically accessed by Cytoscape [22] through the dedicated plugin  
43 APID2NET [23], was carried out to understand the involvement of the studied interactome.  
44 APID integrates in a single web-based tool all known experimentally validated PPI from BIND  
45 [24], BioGRID [25], DIP [26], HPRD [27], IntAct [28] and MINT [29] databases.  
46  
47  
48  
49  
50  
51

## 52 **Results and Discussion**

53

54 Leprosy, an ideal model of a chronic human complex infectious disease, provides an opportunity  
55 to dissect the components of the host dependent polygenic susceptibility to this disease. In order  
56  
57  
58  
59  
60

1  
2  
3  
4  
5  
6  
7  
8  
9  
10  
11  
12  
13  
14  
15  
16  
17  
18  
19  
20  
21  
22  
23  
24  
25  
26  
27  
28  
29  
30  
31  
32  
33  
34  
35  
36  
37  
38  
39  
40  
41  
42  
43  
44  
45  
46  
47  
48  
49  
50  
51  
52  
53  
54  
55  
56  
57  
58  
59  
60

to understand the role of multiple genes together, an interaction analysis was carried out between the genotype status of functionally different variants of different genetic loci involved in immune response, with an expected combined effect on the outcome of the disease in different polar forms of the disease. The interaction analysis carried out between PARK2 gene regulatory region SNPs (rs9365492 & rs9355403) [18] and SNPs of the anti-inflammatory cytokines [14] provided a significant risk towards the leprosy susceptibility; combining individually with SNPs of IL-10 (OR=1.99), IL-6 (OR=1.33) and TGFBR2 (OR=1.29) cytokine genes. However, with IL10RB (receptor beta), the result showed a significant protection towards the disease (OR=0.61). Similar analysis between PARK2 SNPs with pro-inflammatory cytokine genes TNF-alpha and BTNL2-DRA interval (showing strong LD with the BTNL2 promoter SNPs) [16] provided a significant risk towards leprosy susceptibility with OR=2.10 and OR=5.40, respectively. However, the SNPs of BAT-1, NFKABIL1, LTA, TNF-LTB, IL12B [16 17] provided a significant protection towards leprosy with OR=0.65, OR=0.58, OR=0.61, OR=0.54 and OR=0.71, respectively (Table 1, Figure S1).

In the second step of combined interaction analysis with all the genes, either providing protection or risk towards leprosy, showed that the combined genotypic interaction analysis of the SNP loci PARK2, TNF, BTNL2-DR, IL10, IL-6 and TGFBR2, further increased the risk of leprosy (OR=2.54); and a similar combined analysis for loci PARK2, BAT1, NFKBIL1, LTA, TNF-LTB, IL12B and IL10RB, increased protection towards leprosy (OR=0.26), in comparison to their individual contribution ( Table 2 (a, b)).

PARK2, encoding the E3 ubiquitin ligase protein-parkin, has been shown to involve in the cellular ubiquitination metabolism [30], providing resistance to intracellular pathogen via ubiquitin mediated autophagy [19]. Also, respond to infection in a regulated way by producing important cytokines [20], suppressing molecules that limit pro-inflammatory - IL-2 [31], TNF-alpha cytokine production and enhancing the production of anti-inflammatory cytokines, IL-4, IL-10, and IL-13 [32-37]. All these observations indicate the *in-vivo* importance of PARK2 gene product-parkin to be centrally involved in immune-regulatory network, working against the invading mycobacteria; justifying to find out an interesting relation between important immune-regulatory cytokines with PARK2, essentially shown to be involved in the host responses to *M. leprae* [38] and also for pathogenesis of the disease [8 39].

1  
2  
3  
4  
5 The genotypic analysis carried out in the North Indian population revealed PARK2 to be  
6 centrally involved as an important immuno-regulator molecule at the genetic level. This result  
7 opens the way for future studies to see the *in-vivo* effect of PARK2 variations at the expression  
8 level for all the important pro-/anti- inflammatory cytokine proteins involved in the immune  
9 system. To have an *in-silico* understanding of immuno-regulatory protein interactions we further  
10 carried out *in-silico* analysis to identify the Protein-Protein Interaction (PPI) of PARK2. We used  
11 APID2NET and Cytoscape tools for PARK2 interaction Data retrieval, providing a total of 43  
12 PARK2 interacting proteins. However, the result did not provide any direct interaction of the  
13 PARK2 with the cytokines studied by us in North Indian population [14 16-18]. However we  
14 considered 43 PARK2 interacting proteins for pathways analysis by using KEGG , BioCarta,  
15 Nci-Nature and Reactome tools, resulting these 43 proteins to be involved in 253 different  
16 pathways (without removing overlapping pathways). Similarly, in the second step we identified  
17 pathways for 11 cytokine proteins studied by us in North Indian population [14 16-18], this  
18 results the involvement of 5 cytokine proteins; IL12B, IL6, TNF, TGFR2 & IL10 in 94  
19 pathways, not involving BTNL2, BAT1, NFKBIL, LTA, IL10RB2 & BTNL2-DR in any  
20 pathways. Comparing both pathways; 253, PARK2 interacting proteins pathways and 94,  
21 cytokine proteins pathways; reveals 27 commonly involved pathways, via CASP8, CUL1,  
22 CCNE1 & CCNA proteins, involving only 5 (IL12B, IL6, TNF, TGFR2 & IL10) out of 11  
23 cytokine proteins studied in North Indian population (Figure-1), connecting majorly through  
24 Toll-like receptor signaling pathways (Figure 1, Table S1).  
25  
26  
27  
28  
29  
30  
31  
32  
33  
34  
35  
36  
37  
38  
39  
40  
41

42 The above interaction and pathway analysis allows us to propose that the complex genetic  
43 background is the predominant factor for the outcome of the disease, where the combined effect  
44 of the variant risk alleles of the PARK2 gene, responsible for affecting transcription binding site  
45 and lowering the expression of the reporter gene by *in-vitro* experiment [18], along with the risk  
46 alleles of the anti-inflammatory cytokines genes - IL-10, IL-6, TGFBR2, responsible for  
47 lowering the CMI response towards the invading bacteria and pro-inflammatory cytokines -  
48 TNF-alpha; is responsible in providing highly significant risk towards leprosy. The study opens a  
49 way for future *in-vivo* work of immune-response read outs in complex variant genomic  
50 backgrounds to understand the wide gap in understanding the balance in the network of all the  
51  
52  
53  
54  
55  
56  
57  
58  
59  
60



1  
2  
3 immune regulatory molecules operational in providing either susceptibility or resistance towards  
4 disease.  
5  
6  
7

### 8 **Acknowledgments:**

9  
10  
11 We thank all who participated in the study. Authors thank Dr. Shobit Caroli and Dr. Sudhanshu,  
12 Dr. Shalu the attending physicians at LNJP Hospital and Prof. Jason P. Sinnwell for his  
13 invaluable support in providing Haplo.Stats package.  
14  
15  
16

17 **Contributorship Statement:** Rameshwar N. K. Bamezai and Rupali Chopra contributed in  
18 planning, designing and execution of work and wrote the article; Rupali Chopra, Shafat Ali,  
19 Ponnusamy Kalaiarasan Shweta Aggarwal and Amit Kumar Srivastava contributed in  
20 biostatistics and in-silico analysis; Vijay K. Garg and S.N. Bhattacharya contributed in patient  
21 evaluation, clinical categorization and discussion. All authors critically reviewed the manuscript.  
22 Rameshwar N. K. Bamezai led the research effort.  
23  
24  
25  
26  
27  
28

29 **Data sharing statement:** Extra data is made available by contacting corresponding author at  
30 Email ID: bamezai@hotmail.com.  
31  
32

33 **Funding:** Financial and Infrastructural support for the production of manuscript was provided by  
34 Shri Mata Vaishno Devi University, University Grants Commission; and high-throughput project  
35 from DBT to the National center of Applied Human Genetics.  
36  
37  
38

39 **Non-financial competing interests:** No conflict of interest.  
40  
41

42 **Patient consent:** Obtained.  
43  
44

45 **Ethics approval:** Approved by Jawaharlal Nehru University ethics committee, New Delhi,  
46 India.  
47  
48

49 **Provenance and peer review:** Not commissioned; externally peer reviewed.  
50  
51

52 **Figure 1: PARK2 Interaction Analysis:** unfilled circles showing the PARK2 interacting  
53 proteins, Light grey circles showing protein links between the PARK2 interacting protein and 5  
54 cytokines protein (dark grey circles) study by us in North India population  
55  
56  
57  
58  
59  
60

1  
2  
3 **Figure S1: a.** Schematic representation of the genotypic interaction analysis of PARK2 gene  
4 regulatory region SNPs rs9365492 and rs9355403 with the SNPs of genes providing Risk toward  
5 the Leprosy. Genotypes/Alleles in red color represent risk. **b.** Schematic representation of the  
6 genotypic interaction analysis of PARK2 gene regulatory region SNPs; rs9365492 and  
7 rs9355403 with the SNPs of gene providing Protection towards the Leprosy. Genotypes/Alleles  
8 in red color represent risk.  
9  
10  
11  
12  
13

14 **Table S1:** Pathway analysis of PARK2 interacting protein with Cytokines studied by us in  
15 Indian population groups.  
16  
17  
18  
19  
20  
21  
22  
23  
24  
25  
26  
27  
28  
29  
30  
31  
32  
33  
34  
35  
36  
37  
38  
39  
40  
41  
42  
43  
44  
45  
46  
47  
48  
49  
50  
51  
52  
53  
54  
55  
56  
57  
58  
59  
60

**Table 1:** Genotype interaction analysis of PARK2 SNPs with pro-/anti- inflammatory cytokines gene SNPs providing risk/protection towards Leprosy susceptibility

1  
2  
3  
4

| PARK2 (SNPs are within 63.8kb upstream gene region) |                                 | GENE                            | SNPs PROVIDING RISK                                 |                                                     |                                        | No. of Samples |           | Sig.     | OR    | 95% C.I.for EXP(B) |       |
|-----------------------------------------------------|---------------------------------|---------------------------------|-----------------------------------------------------|-----------------------------------------------------|----------------------------------------|----------------|-----------|----------|-------|--------------------|-------|
|                                                     |                                 |                                 |                                                     |                                                     |                                        | Patients       | Contr ols |          |       | Lower              | Upper |
| rs9365492; Minor, Risk allele-C                     | rs9355403; Minor, Risk allele-A | IL-10                           | rs1800871 (-819); Minor, Risk allele-T              | rs1554286 (intron 3 boundary); Minor, Risk allele-T | rs1800872 (-592); Minor, Risk allele-A |                |           |          |       |                    |       |
| TC+CC                                               | GA+AA                           |                                 | CT+TT                                               | TT                                                  | CA+AA                                  | 82             | 84        | 3.22E-05 | 1.997 | 1.441              | 2.767 |
|                                                     |                                 | TGFBR2                          | rs2228048 (3' UTR Downstream); Minor, Risk allele-T | rs744751(3' UTR Downstream); Minor, Risk allele-G   |                                        |                |           |          |       |                    |       |
|                                                     |                                 |                                 | CT+CC                                               | GG                                                  |                                        | 287            | 400       | 1.04E-02 | 1.293 | 1.062              | 1.575 |
|                                                     |                                 | IL-6                            | rs1800797 (-718); Minor, Risk allele-G              |                                                     |                                        |                |           |          |       |                    |       |
|                                                     |                                 |                                 | GG                                                  |                                                     |                                        | 320            | 432       | 2.90E-03 | 1.333 | 1.103              | 1.611 |
|                                                     |                                 | TNF                             | rs1800629 (-308); Minor, Risk allele-G              | rs1800610 (Intron-1); Minor, Risk allele-G          |                                        |                |           |          |       |                    |       |
|                                                     |                                 |                                 | GG                                                  | GG                                                  |                                        | 311            | 420       | 2.06E-09 | 2.103 | 1.649              | 2.682 |
|                                                     |                                 | BTNL2-DRA interval              | rs3135365; Minor, Risk allele-C                     | rs7773756; Minor, Risk allele-T                     |                                        |                |           |          |       |                    |       |
|                                                     | CA+CC                           | CT+TT                           |                                                     | 272                                                 | 269                                    | 1.22E-21       | 5.4       | 3.821    | 7.631 |                    |       |
| <b>SNPs PROVIDING PROTECTION</b>                    |                                 |                                 |                                                     |                                                     |                                        |                |           |          |       |                    |       |
| TT                                                  | GG                              | LTA                             | rs13192469(13kb upstream); Minor, Risk allele-C     | rs36221459 (-1409); Minor, Risk allele-DEL          |                                        |                |           |          |       |                    |       |
|                                                     |                                 |                                 | TT                                                  | GTTT                                                |                                        | 240            | 571       | 3.56E-07 | 0.616 | 0.512              | 0.743 |
|                                                     |                                 | IL-10RB2                        | rs3171425 (3' UTR); Major, Risk allele-G            | rs7281762 (3' UTR Downstream); Minor, Risk allele-A |                                        |                |           |          |       |                    |       |
|                                                     |                                 |                                 | GA+AA                                               | GA+GG                                               |                                        | 164            | 391       | 1.10E-05 | 0.61  | 0.489              | 0.76  |
|                                                     |                                 | BAT1                            | rs2523504 (-603); Minor, Risk allele-T              |                                                     |                                        |                |           |          |       |                    |       |
|                                                     |                                 |                                 | CC                                                  |                                                     |                                        | 192            | 475       | 4.15E-05 | 0.645 | 0.523              | 0.795 |
|                                                     |                                 | NFKBIL                          | rs2230365 (Exon-3); Minor, Risk allele-T            |                                                     |                                        |                |           |          |       |                    |       |
|                                                     |                                 |                                 | CC                                                  |                                                     |                                        | 195            | 486       | 1.01E-07 | 0.589 | 0.484              | 0.715 |
|                                                     |                                 | TNF-LTB                         | rs769178 (Gene Downstream); Major, Risk allele-G    |                                                     |                                        |                |           |          |       |                    |       |
|                                                     |                                 |                                 | GT+TT                                               |                                                     |                                        | 66             | 211       | 8.93E-05 | 0.546 | 0.404              | 0.739 |
|                                                     | IL12B                           | rs2853694; Major, Risk allele-A |                                                     |                                                     |                                        |                |           |          |       |                    |       |
|                                                     | CA+CC                           |                                 |                                                     | 233                                                 | 519                                    | 5.03E-04       | 0.705     | 0.579    | 0.858 |                    |       |

45  
46  
47  
48  
49

**Table 2:** Combined interaction analysis of all the SNPs either providing protection or risk towards Leprosy susceptibility

a. Analysis of SNPs providing Protection

|             | No. of Samples |      | PARK2     | PARK2     | BAT1 Promoter | NFKBIL    | LTA 13kb upstream | LTA Promoter | TNF-LTB  | IL10RB    | IL10RB    | IL12B     | Sig.     | OR    | 95% C.I.for EXP(B) |       |
|-------------|----------------|------|-----------|-----------|---------------|-----------|-------------------|--------------|----------|-----------|-----------|-----------|----------|-------|--------------------|-------|
|             | Pat            | Cont | rs9365492 | rs9355403 | rs2523504     | rs2230365 | rs13192469        | rs36221459   | rs769178 | rs3171425 | rs7281762 | rs2853694 |          |       | Lower              | Upper |
| Alleles     |                |      | T/C       | G/A       | C/T           | C/T       | T/C               | GTTT/DEL     | G/T      | G/A       | G/A       | A/C       |          |       |                    |       |
| Risk Allele |                |      | C         | A         | T             | T         | C                 | DEL          | G        | G         | A         | A         |          |       |                    |       |
| TOTAL       | 10             | 59   | TT        | GG        | CC            | CC        | TT                | GTTT         | GT+TT    | GA+AA     | GA+GG     | CA+CC     | 1.15E-04 | 0.263 | 0.133              | 0.518 |
| PB/HC       | 2              | 59   | TT        | GG        | CC            | CC        | TT                | GTTT         | GT+TT    | GA+AA     | GA+GG     | CA+CC     | 2.36E-03 | 0.111 | 0.027              | 0.458 |
| MB/HC       | NA             |      |           |           |               |           |                   |              |          |           |           |           |          |       |                    |       |

b. Analysis of SNPs providing Risk

|             | No. of Samples |      | PARK2     | PARK2     | IL-10     | IL-10     | IL-10     | IL-6      | TGFBR2    | TGFBR2   | TNF (-308) Promoter | TNF intron1 | BTNL2-DRA interval | BTNL2-DRA interval | Sig.     | OR    | 95% C.I.for EXP(B) |       |
|-------------|----------------|------|-----------|-----------|-----------|-----------|-----------|-----------|-----------|----------|---------------------|-------------|--------------------|--------------------|----------|-------|--------------------|-------|
|             | Pat            | Cont | rs9365492 | rs9355403 | rs1800871 | rs1554286 | rs1800872 | rs1800797 | rs2228048 | rs744751 | rs1800629           | rs1800610   | rs3135365          | rs7773756          |          |       | Lower              | Upper |
| Alleles     |                |      | T/C       | G/A       | C/T       | C/T       | C/A       | G/A       | C/T       | G/A      | G/A                 | G/A         | A/C                | C/T                |          |       |                    |       |
| Risk Allele |                |      | C         | A         | T         | T         | A         | G         | T         | G        | G                   | G           | C                  | T                  |          |       |                    |       |
| Total       | 57             | 44   | TC+CC     | GA+AA     | CT+TT     | CT+CC     | CA+AA     | GG        | CT+CC     | GA+AA    | GG                  | GG          | CA+CC              | CT+TT              | 5.77E-06 | 2.543 | 1.699              | 3.806 |
| PB/HC       | 32             | 44   | TC+CC     | GA+AA     | CT+TT     | CT+CC     | CA+AA     | GG        | CT+CC     | GG       | GG                  | GG          | CA+CC              | CT+TT              | 3.73E-06 | 3.028 | 1.894              | 4.843 |
| MB/HC       | 25             | 44   | TC+CC     | GA+AA     | CT+TT     | CT+CC     | CA+AA     | GG        | CT+CC     | GG       | GG                  | GG          | CA+CC              | CT+TT              | 3.16E-03 | 2.133 | 1.29               | 3.528 |

**References:**

1. Monot M, Honore N, Garnier T, et al. Comparative genomic and phylogeographic analysis of *Mycobacterium leprae*. *Nat Genet* 2009;**41**(12):1282-9 doi: ng.477 [pii]  
10.1038/ng.477[published Online First: Epub Date]].
2. Shields ED, Russell DA, Pericak-Vance MA. Genetic epidemiology of the susceptibility to leprosy. *The Journal of clinical investigation* 1987;**79**(4):1139-43 doi: 10.1172/JCI112930[published Online First: Epub Date]].
3. Chakravarti M, Vogel F. A twin study on leprosy. *Topics in human genetics*. Stuttgart, Germany: Georg Thieme Verlag 1973;**1**:1-123
4. Abel L, Demenais F. Detection of major genes for susceptibility to leprosy and its subtypes in a Caribbean island: Desirade island. *American journal of human genetics* 1988;**42**(2):256-66
5. Abel L, Vu DL, Oberti J, et al. Complex segregation analysis of leprosy in southern Vietnam. *Genetic epidemiology* 1995;**12**(1):63-82 doi: 10.1002/gepi.1370120107[published Online First: Epub Date]].
6. Todd JR, West BC, McDonald JC. Human leukocyte antigen and leprosy: study in northern Louisiana and review. *Reviews of infectious diseases* 1990;**12**(1):63-74
7. Wong SH, Gochhait S, Malhotra D, et al. Leprosy and the adaptation of human toll-like receptor 1. *PLoS pathogens* 2010;**6**:e1000979 doi: 10.1371/journal.ppat.1000979[published Online First: Epub Date]].
8. Zhang FR, Huang W, Chen SM, et al. Genomewide association study of leprosy. *The New England journal of medicine* 2009;**361**(27):2609-18 doi: 10.1056/NEJMoa0903753[published Online First: Epub Date]].
9. Fitness J, Tosh K, Hill AV. Genetics of susceptibility to leprosy. *Genes and immunity* 2002;**3**(8):441-53 doi: 10.1038/sj.gene.6363926[published Online First: Epub Date]].
10. Gomolka M, Menninger H, Saal JE, et al. Immunoprinting: various genes are associated with increased risk to develop rheumatoid arthritis in different groups of adult patients. *J Mol Med* 1995;**73**(1):19-29
11. Mok CC, Lanchbury JS, Chan DW, et al. Interleukin-10 promoter polymorphisms in Southern Chinese patients with systemic lupus erythematosus. *Arthritis Rheum* 1998;**41**(6):1090-5 doi: 10.1002/1529-0131(199806)41:6<1090::AID-ART16>3.0.CO;2-6[published Online First: Epub Date]].
12. Loughrey BV, Maxwell AP, Fogarty DG, et al. An interleukin 1B allele, which correlates with a high secretor phenotype, is associated with diabetic nephropathy. *Cytokine* 1998;**10**(12):984-8 doi: S1043-4666(98)90388-X [pii]  
10.1006/cyto.1998.0388[published Online First: Epub Date]].
13. Morahan G, Huang D, Wu M, et al. Association of IL12B promoter polymorphism with severity of atopic and non-atopic asthma in children. *Lancet* 2002;**360**(9331):455-9 doi: S0140-6736(02)09676-9 [pii]  
10.1016/S0140-6736(02)09676-9[published Online First: Epub Date]].
14. Aggarwal S, Ali S, Chopra R, et al. Genetic variations and interactions in anti-inflammatory cytokine pathway genes in the outcome of leprosy: a study conducted on a MassARRAY platform. *The Journal of infectious diseases* 2011;**204**(8):1264-73 doi: 10.1093/infdis/jir516[published Online First: Epub Date]].

15. Alcais A, Alter A, Antoni G, et al. Stepwise replication identifies a low-producing lymphotoxin-alpha allele as a major risk factor for early-onset leprosy. *Nature genetics* 2007;**39**(4):517-22 doi: 10.1038/ng2000[published Online First: Epub Date]].
16. Ali S, Chopra R, Aggarwal S, et al. Association of variants in BAT1-LTA-TNF-BTNL2 genes within 6p21.3 region show graded risk to leprosy in unrelated cohorts of Indian population. *Human genetics* 2012;**131**(5):703-16 doi: 10.1007/s00439-011-1114-6[published Online First: Epub Date]].
17. Ali S, Srivastava AK, Chopra R, et al. IL12B SNPs and copy number variation in IL23R gene associated with susceptibility to leprosy. *Journal of medical genetics* 2013;**50**(1):34-42 doi: 10.1136/jmedgenet-2012-101214[published Online First: Epub Date]].
18. Chopra R, Ali S, Srivastava AK, et al. Mapping of PARK2 and PACRG Overlapping Regulatory Region Reveals LD Structure and Functional Variants in Association with Leprosy in Unrelated Indian Population Groups. *PLoS genetics* 2013;**9**(7):e1003578 doi: 10.1371/journal.pgen.1003578[published Online First: Epub Date]].
19. Manzanillo PS, Ayres JS, Watson RO, et al. The ubiquitin ligase parkin mediates resistance to intracellular pathogens. *Nature* 2013 doi: 10.1038/nature12566[published Online First: Epub Date]].
20. de Leseleuc L, Orlova M, Cobat A, et al. PARK2 mediates interleukin 6 and monocyte chemoattractant protein 1 production by human macrophages. *PLoS neglected tropical diseases* 2013;**7**(1):e2015 doi: 10.1371/journal.pntd.0002015[published Online First: Epub Date]].
21. Danielssen DC, Boeck W, Losting JL. Om Spedalskhed [on leprosy]. *Christiana Chr Grondahl 1847*
22. Smoot ME, Ono K, Ruschinski J, et al. Cytoscape 2.8: new features for data integration and network visualization. *Bioinformatics* 2011;**27**(3):431-2 doi: 10.1093/bioinformatics/btq675[published Online First: Epub Date]].
23. Hernandez-Toro J, Prieto C, De las Rivas J. APID2NET: unified interactome graphic analyzer. *Bioinformatics* 2007;**23**(18):2495-7 doi: 10.1093/bioinformatics/btm373[published Online First: Epub Date]].
24. Bader GD, Betel D, Hogue CW. BIND: the Biomolecular Interaction Network Database. *Nucleic acids research* 2003;**31**(1):248-50
25. Chatr-Aryamontri A, Breitkreutz BJ, Heinicke S, et al. The BioGRID interaction database: 2013 update. *Nucleic acids research* 2013;**41**(Database issue):D816-23 doi: 10.1093/nar/gks1158[published Online First: Epub Date]].
26. Salwinski L, Miller CS, Smith AJ, et al. The Database of Interacting Proteins: 2004 update. *Nucleic acids research* 2004;**32**(Database issue):D449-51 doi: 10.1093/nar/gkh086[published Online First: Epub Date]].
27. Keshava Prasad TS, Goel R, Kandasamy K, et al. Human Protein Reference Database--2009 update. *Nucleic acids research* 2009;**37**(Database issue):D767-72 doi: 10.1093/nar/gkn892[published Online First: Epub Date]].
28. Kerrien S, Aranda B, Breuza L, et al. The IntAct molecular interaction database in 2012. *Nucleic acids research* 2012;**40**(Database issue):D841-6 doi: 10.1093/nar/gkr1088[published Online First: Epub Date]].
29. Licata L, Briganti L, Peluso D, et al. MINT, the molecular interaction database: 2012 update. *Nucleic acids research* 2012;**40**(Database issue):D857-61 doi: 10.1093/nar/gkr930[published Online First: Epub Date]].
30. Shimura H, Hattori N, Kubo S, et al. Familial Parkinson disease gene product, parkin, is a ubiquitin-protein ligase. *Nature genetics* 2000;**25**(3):302-5 doi: 10.1038/77060[published Online First: Epub Date]].

- 1  
2  
3  
4  
5  
6  
7  
8  
9  
10  
11  
12  
13  
14  
15  
16  
17  
18  
19  
20  
21  
22  
23  
24  
25  
26  
27  
28  
29  
30  
31  
32  
33  
34  
35  
36  
37  
38  
39  
40  
41  
42  
43  
44  
45  
46  
47  
48  
49  
50  
51  
52  
53  
54  
55  
56  
57  
58  
59  
60
31. Mueller DL. E3 ubiquitin ligases as T cell anergy factors. *Nature immunology* 2004;**5**(9):883-90 doi: 10.1038/ni1106[published Online First: Epub Date]].
  32. Garcia-Covarrubias L, Manning EW, 3rd, Sorell LT, et al. Ubiquitin enhances the Th2 cytokine response and attenuates ischemia-reperfusion injury in the lung. *Critical care medicine* 2008;**36**(3):979-82 doi: 10.1097/CCM.0B013E318164E417[published Online First: Epub Date]].
  33. Majetschak M. Extracellular ubiquitin: immune modulator and endogenous opponent of damage-associated molecular pattern molecules. *Journal of leukocyte biology* 2011;**89**(2):205-19 doi: 10.1189/jlb.0510316[published Online First: Epub Date]].
  34. Majetschak M, Krehmeier U, Bardenheuer M, et al. Extracellular ubiquitin inhibits the TNF-alpha response to endotoxin in peripheral blood mononuclear cells and regulates endotoxin hyporesponsiveness in critical illness. *Blood* 2003;**101**(5):1882-90 doi: 10.1182/blood-2002-03-0918[published Online First: Epub Date]].
  35. Patel MB, Majetschak M. Distribution and interrelationship of ubiquitin proteasome pathway component activities and ubiquitin pools in various porcine tissues. *Physiological research / Academia Scientiarum Bohemoslovaca* 2007;**56**(3):341-50
  36. Saini V, Romero J, Marchese A, et al. Ubiquitin receptor binding and signaling in primary human leukocytes. *Communicative & integrative biology* 2010;**3**(6):608-10 doi: 10.4161/cib.3.6.13375[published Online First: Epub Date]].
  37. Singh M, Roginskaya M, Dalal S, et al. Extracellular ubiquitin inhibits beta-AR-stimulated apoptosis in cardiac myocytes: role of GSK-3beta and mitochondrial pathways. *Cardiovascular research* 2010;**86**(1):20-8 doi: 10.1093/cvr/cvp402[published Online First: Epub Date]].
  38. Mira MT, Alcais A, Nguyen VT, et al. Susceptibility to leprosy is associated with PARK2 and PACRG. *Nature* 2004;**427**(6975):636-40 doi: 10.1038/nature02326[published Online First: Epub Date]].
  39. Schurr E, Alcais A, de Leseleuc L, et al. Genetic predisposition to leprosy: A major gene reveals novel pathways of immunity to *Mycobacterium leprae*. *Seminars in immunology* 2006;**18**(6):404-10 doi: 10.1016/j.smim.2006.07.005[published Online First: Epub Date]].

1  
2  
3  
4  
5  
6  
7  
8  
9  
10  
11  
12  
13  
14  
15  
16  
17  
18  
19  
20  
21  
22  
23  
24  
25  
26  
27  
28  
29  
30  
31  
32  
33  
34  
35  
36  
37  
38  
39  
40  
41  
42  
43  
44  
45  
46  
47  
48  
49  
50  
51  
52  
53  
54  
55  
56  
57  
58  
59  
60

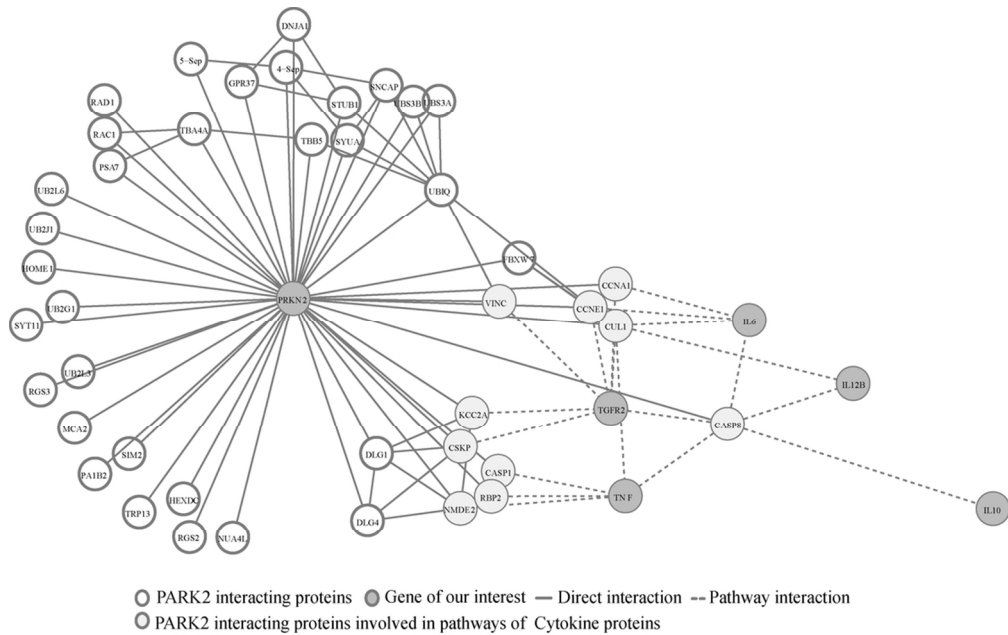

PARK2 Interaction Analysis: unfilled circles showing the PARK2 interacting proteins, Light grey circles showing protein links between the PARK2 interacting protein and 5 cytokines protein (dark grey circles) study by us in North India population  
100x62mm (300 x 300 DPI)

view only



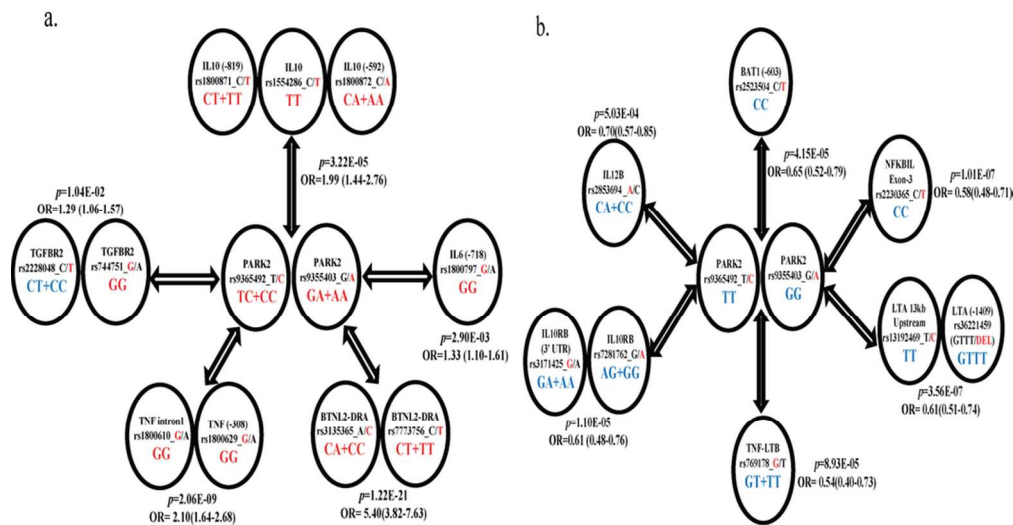

a. Schematic representation of the genotypic interaction analysis of PARK2 gene regulatory region SNPs rs9365492 and rs9355403 with the SNPs of genes providing Risk toward the Leprosy. Genotypes/Alleles in red color represent risk. b. Schematic representation of the genotypic interaction analysis of PARK2 gene regulatory region SNPs; rs9365492 and rs9355403 with the SNPs of gene providing Protection towards the Leprosy. Genotypes/Alleles in red color represent risk. 89x46mm (300 x 300 DPI)

review only

1  
2  
3  
4  
5  
6  
7  
8  
9  
10  
11  
12  
13  
14  
15  
16  
17  
18  
19  
20  
21  
22  
23  
24  
25  
26  
27  
28  
29  
30  
31  
32  
33  
34  
35  
36  
37  
38  
39  
40  
41  
42  
43  
44  
45  
46  
47  
48  
49

**Table S1:** Pathway analysis of PARK2 interacting protein with Cytokines studied by us in Indian population groups

| PARK2-interacting proteins | Uniport_ID of PARK2 interacting proteins | PATHWAYS involving PARK2 interacting proteins and Cytokine genes | Cytokine genes   | Databases used for Pathways retrieval |
|----------------------------|------------------------------------------|------------------------------------------------------------------|------------------|---------------------------------------|
| CUL1                       | Q13616                                   | Adherens junction                                                | TGFR2            | KEGG                                  |
| VINC                       | P18206                                   | Adherens junction                                                | TGFR2            | KEGG                                  |
| CUL1                       | Q13616                                   | Amyotrophic lateral sclerosis (ALS)                              | TNF              | KEGG                                  |
| NMDE2                      | Q13224                                   | Amyotrophic lateral sclerosis (ALS)                              | TNF              | KEGG                                  |
| CUL1                       | Q13616                                   | Angiotensin receptor Tie2-mediated signaling                     | TNF              | Nci-Nature                            |
| CASP8                      | Q14790                                   | Apoptosis                                                        | TNF              | KEGG                                  |
| CASP8                      | Q14790                                   | caspase cascade in apoptosis                                     | TNF              | BioCarta                              |
| CASP8                      | Q14790                                   | Caspase cascade in apoptosis                                     | TNF              | Nci-Nature                            |
| CASP1                      | P29466                                   | caspase cascade in apoptosis                                     | TNF              | BioCarta                              |
| CASP1                      | P29466                                   | Caspase cascade in apoptosis                                     | TNF              | Nci-Nature                            |
| CASP1                      | P29466                                   | Cellular roles of Anthrax toxin                                  | TNF              | Nci-Nature                            |
| CASP8                      | Q14790                                   | ceramide signaling pathway                                       | TNF              | BioCarta                              |
| CASP8                      | Q14790                                   | Ceramide signaling pathway                                       | TNF              | Nci-Nature                            |
| CASP8                      | Q14790                                   | Chagas disease                                                   | IL10, TGFR2, TNF | KEGG                                  |
| CUL1                       | Q13616                                   | Fc epsilon RI signaling pathway                                  | TNF              | KEGG                                  |
| CASP8                      | Q14790                                   | hiv-1 nef: negative effector of fas and tnf                      | TNF              | BioCarta                              |
| CASP8                      | Q14790                                   | HIV-1 Nef: Negative effector of Fas and TNF-alpha                | TNF              | Nci-Nature                            |
| CUL1                       | Q13616                                   | IL6-mediated signaling events                                    | IL6              | Nci-Nature                            |
| CUL1                       | Q13616                                   | Integrins in angiogenesis                                        | TGFR2            | Nci-Nature                            |
| CASP8                      | Q14790                                   | Integrins in angiogenesis                                        | TGFR2            | Nci-Nature                            |
| VINC                       | P18206                                   | Integrins in angiogenesis                                        | TGFR2            | Nci-Nature                            |
| CUL1                       | Q13616                                   | LPA receptor mediated events                                     | IL6              | Nci-Nature                            |

|       |        |                                           |                 |            |
|-------|--------|-------------------------------------------|-----------------|------------|
| CUL1  | Q13616 | MAPK signaling pathway                    | TGFR2, TNF      | KEGG       |
| CUL1  | Q13616 | Natural killer cell mediated cytotoxicity | TNF             | KEGG       |
| RBP2  | P49792 | Signaling events mediated by HDAC Class I | TNF             | Nci-Nature |
| CSKP  | O14936 | Syndecan-1-mediated signaling events      | TGFR2           | Nci-Nature |
| KCC2A | Q9UQM7 | TGF-beta receptor signaling               | TGFR2           | Nci-Nature |
| CUL1  | Q13616 | TGF-beta signaling pathway                | TGFR2, TNF      | KEGG       |
| CASP8 | Q14790 | TNF receptor signaling pathway            | TNF             | Nci-Nature |
| CASP8 | Q14790 | TNF signaling                             | TNF             | Reactome   |
| CASP8 | Q14790 | tnfr1 signaling pathway                   | TNF             | BioCarta   |
| CUL1  | Q13616 | Toll-like receptor signaling pathway      | IL6, TNF, IL12B | KEGG       |
| CASP8 | Q14790 | Toll-like receptor signaling pathway      | IL6, TNF, IL12B | KEGG       |

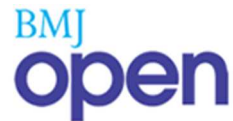

**PARK2 and pro-/anti- inflammatory cytokine gene interactions contribute to the susceptibility to Leprosy – A Case/Control study of North Indian population**

|                                 |                                                                                                                                                                                                                                                                                                                                                                                                                                                                                                                                                                                                                                                                                                                                                             |
|---------------------------------|-------------------------------------------------------------------------------------------------------------------------------------------------------------------------------------------------------------------------------------------------------------------------------------------------------------------------------------------------------------------------------------------------------------------------------------------------------------------------------------------------------------------------------------------------------------------------------------------------------------------------------------------------------------------------------------------------------------------------------------------------------------|
| Journal:                        | <i>BMJ Open</i>                                                                                                                                                                                                                                                                                                                                                                                                                                                                                                                                                                                                                                                                                                                                             |
| Manuscript ID:                  | bmjopen-2013-004239.R1                                                                                                                                                                                                                                                                                                                                                                                                                                                                                                                                                                                                                                                                                                                                      |
| Article Type:                   | Research                                                                                                                                                                                                                                                                                                                                                                                                                                                                                                                                                                                                                                                                                                                                                    |
| Date Submitted by the Author:   | 22-Dec-2013                                                                                                                                                                                                                                                                                                                                                                                                                                                                                                                                                                                                                                                                                                                                                 |
| Complete List of Authors:       | Chopra, Rupali; Shri Mata Vaishno Devi University, School of Biotechnology,<br>Kalaiarasan, Ponnusamy; Shri Mata Vaishno Devi University, School of Biotechnology,<br>Ali, Shafat; NCAHG, School of Life Sciences, Jawaharlal Nehru university<br>Srivastava, Amit; NCAHG, School of Life Sciences, Jawaharlal Nehru university<br>Aggarwal, Shweta; NCAHG, School of Life Sciences, Jawaharlal Nehru university<br>Garg, Vijay; Maulana Azad Medical College, Lok Nayak Jai Prakash Hospital, Department of Dermatology and Sexually Transmitted Diseases<br>Bhattacharya, S.; University College of Medical Sciences and GTB Hospital, Department of Dermatology and Venereology<br>Bamezai, Ramesh; JAWAHARLAL NEHRU UNIVERSITY, SCHOOL OF LIFE SCIENCES |
| <b>Primary Subject Heading</b>: | Genetics and genomics                                                                                                                                                                                                                                                                                                                                                                                                                                                                                                                                                                                                                                                                                                                                       |
| Secondary Subject Heading:      | Infectious diseases, Global health                                                                                                                                                                                                                                                                                                                                                                                                                                                                                                                                                                                                                                                                                                                          |
| Keywords:                       | PARK2, pro-/anti- inflammatory cytokine genes, Leprosy, Gene interaction                                                                                                                                                                                                                                                                                                                                                                                                                                                                                                                                                                                                                                                                                    |
|                                 |                                                                                                                                                                                                                                                                                                                                                                                                                                                                                                                                                                                                                                                                                                                                                             |

SCHOLARONE™  
Manuscripts

1  
2  
3  
4  
5  
6  
7  
8  
9

**Title: PARK2 and pro-/anti- inflammatory cytokine gene interactions  
contribute to the susceptibility to Leprosy – A Case/Control study of North  
Indian population**

10  
11  
12  
13

Rupali Chopra 1, Ponnusamy Kalaiarasan 1, Shafat Ali 2, Amit K. Srivastava 2, Shweta Aggarwal 2, Vijay K. Garg 3, Sambit N. Bhattacharya 4, Rameshwar N. K. Bamezai 2 \*

14  
15  
16  
17

1 Shri Mata Vaishno Devi University, School of Biotechnology, Katra, Jammu & Kashmir, 182320, India

18  
19  
20  
21

2 National Centre of Applied Human Genetics, School of life Sciences, Jawaharlal Nehru University, New Delhi, 110067, India.

22  
23  
24

3 Department of Dermatology and Sexually Transmitted Diseases, Maulana Azad Medical College, Lok Nayak Jai Prakash Hospital, New Delhi, 110002, India.

25  
26  
27  
28

4 Department of Dermatology and Venereology, University College of Medical Sciences and GTB Hospital, Delhi, 110095, India.

29  
30  
31  
32  
33  
34  
35  
36  
37  
38  
39  
40  
41  
42  
43  
44  
45  
46  
47  
48  
49  
50  
51  
52  
53  
54  
55  
56  
57  
58  
59  
60

\*Corresponding author: e-mail address: [bamezai@hotmail.com](mailto:bamezai@hotmail.com), Postal address: Lab No-332, NCAHG, School of Life Sciences, JNU, New Delhi-110067, India. Phone No. 011-26742211.

## Abstract

**Objectives:** Cytokines and related molecules in immune-response pathways seem important in deciding the outcome of the host-pathogen interactions towards different polar forms in Leprosy. Here we study the role of significant and functionally important SNPs in these genes, published independently from our research group, through combined interaction with an additional analysis of the *in-silico* network outcome, to understand how these impact the susceptibility towards the disease, leprosy.

**Design:** Study was designed to assess an overall combined contribution of significantly associated individual SNPs to reflect on epistatic interactions and their outcome in the form of the disease, leprosy. Further *in-silico* approach was adopted to carry out Protein-Protein interaction study between PARK2 and pro-/anti- inflammatory cytokines.

**Setting:** Population based case-control study involved the data of North India. Protein-Protein interaction networks were constructed using Cytoscape.

**Participants:** Study included the data available from 2305 Northern Indians samples (829 Leprosy Patients; 1476 Healthy controls), generated by our research group.

**Primary and secondary outcome measures:** For genotype interaction analysis, all possible genotype combinations between selected SNPs were used as an independent variable, using binary logistic regression with the forward likelihood ratio method, keeping the gender as a covariate.

**Results:** Interaction analysis between PARK2 and significant SNPs of anti-/pro- inflammatory cytokine genes, including (BAT1 to BTNL2-DR) spanning the HLA (6p21.3) region in a case-control comparison, showed that the combined analysis of: (i) PARK2, TNF, BTNL2-DR, IL10, IL-6 & TGFBR2 increased the risk towards leprosy (OR=2.54); (ii) PARK2, BAT1, NFKBIL1, LTA, TNF-LTB, IL12B & IL10RB provided increased protection (OR=0.26) in comparison to their individual contribution.

**Conclusions:** Epistatic SNP-SNP interactions involving PARK2 and cytokine genes provide an additive risk towards leprosy susceptibility. Further, *in-silico* Protein-Protein Interaction of

1  
2  
3 PARK2 and important pro-/anti inflammatory molecules indicate that PARK2 is central to  
4 immune regulation, regulating the production of different cytokines upon infection.  
5  
6

7  
8 **Keywords:** PARK2, pro-/anti- inflammatory cytokine genes, Leprosy, Gene interaction  
9

## 10 **Article Summary**

11  
12 Strengths and limitation of this study

- 13  
14  
15  
16  
17  
18  
19  
20  
21  
22  
23  
24  
25  
26  
27  
28  
29  
30  
31  
32  
33  
34  
35  
36  
37  
38  
39  
40  
41  
42  
43  
44  
45  
46  
47  
48  
49  
50  
51  
52  
53  
54  
55  
56  
57  
58  
59  
60
- Many of the genetic studies lack replication in different population groups, explaining the heterogeneity in associated genes and genomic regions. This may be due to the complex nature of a disease. The complexity, however, could partly be delineated at genetic level by assessing the quantum of the contribution of different loci to the disease in a combined manner instead of their individual role.
  - Our study highlights the importance of a combined effect of the important cytokine and other immune regulatory genes, whose combined effect in diverse genotype combinations, provide either increased risk or protection towards the complex genetic disease, Leprosy.
  - Genetic interaction and an additional *in-silico* pathway analysis provided an overall perspective on how PARK2 gene product; parkin, acts as a centrally placed molecule, playing an important role in regulating different pathways of the immune response and susceptibility to Leprosy. This conclusion needs further support with future experiments *in vitro* or *in vivo* of T cell responses in different genetic backgrounds of the identified networks in this study.

## Introduction

Leprosy caused by *Mycobacterium leprae* is a chronic infectious disease, characterized by clinically defined polar forms in which pathology and immunology are inextricably related, providing a critical model to explore the immuno-regulatory mechanisms in humans. At one pole, tuberculoid form is associated with a strong cell mediated immunity and T helper 1 (Th1) cytokine profile and at the other end of the spectrum, the lepromatous form is associated with a strong humoral response and T helper 2 (Th2) cytokine profile. Cytokines and other related molecules of the immunological pathways thus seem to be a part of significant group of candidates that are apparently critical for the host-pathogen interactions, where the outcome of the disease is majorly dependent on the host factors controlling the immune response, especially when *M. leprae* possesses lowest level of genetic diversity [1]. This is supported by various studies of familial clustering [2], twin studies [3], complex segregation analysis [4 5], test of analysis with the HLA genes [6] including recent genome-wide association studies, [7 8] and studies of several genes that modulate cell-mediated immunity, with a role in either susceptibility to leprosy per se or to leprosy types [9]. Various candidate gene studies and genome-wide approaches have implicated polymorphisms in cytokine genes, whose protein products are part of important immune modulatory molecules, playing a major role in influencing host-pathogen interactions and determine the outcome of many infectious and autoimmune diseases [10-16]. However, only a few observations have been replicated unequivocally in different population groups, suggesting the polygenic nature of the disease with a high degree of heterogeneity among different populations.

We, in the recent past, have studied various candidate genes of pro-/anti-inflammatory cytokines in two independent population groups, North and East India-Orissa; and found strong association with IL-10, IL-10RB, TGFBR2, IL-6 [14], IL-12B [17]. Fine-mapping of a specific 6p (HLA) chromosomal region revealed a significant association of important candidates, BAT1, LTA, TNF and BTNL2 [16]. In a subsequent study of the 6q chromosomal region, involving the overlapping regulatory domain of PARK2-PACRG genes, revealed an involvement of significant SNPs and presence of a differential LD structure in Indian populations as compared to Vietnamese [18]. The latter observation and the functional role of PARK2, as a ubiquitin ligase,



1  
2  
3 has recently been shown in providing resistance to intracellular pathogens [19] through ubiquitin  
4 mediated autophagy. Further the involvement of parkin in regulating production of cytokines  
5 upon infection [20], indeed provides strong hint for any functional variation in the gene having  
6 profound effect in modulating the expression of the immune-regulatory genes. The importance of  
7 all the studied genes [14-18] in the network of immune-response necessitated the analysis of an  
8 interaction between these genes as a whole to understand their contribution together towards the  
9 susceptibility of the complex disease, Leprosy; where the outcome of the infection in all  
10 probabilities depends on the nature of gene interactions between the genes with the potential of  
11 contributing to the immune pathology.  
12  
13  
14  
15  
16  
17  
18  
19

20  
21 The aim, therefore, of this study was to assess an overall interaction between the significant and  
22 functionally important SNPs studied in a case-control comparison of the samples from New  
23 Delhi, in Northern India; where most of these SNPs were replicated in an unrelated East Indian-  
24 Orissa population. These included for an overall interaction the PARK2 gene significant SNPs  
25 [18] with the significant SNPs of anti-inflammatory cytokine genes (IL-10, IL-10RB, TGFBR2,  
26 IL-6) [14], pro-inflammatory cytokine genes (TNF-alpha, LT-alpha, IL-12B) and the genes  
27 spanning the HLA region of the chromosome 6p21.3 i.e., BAT1 to BTNL2-DR [16 17] to  
28 evaluate their combined contribution towards the outcome of the complex infectious disease;  
29 Leprosy.  
30  
31  
32  
33  
34  
35  
36  
37

### 38 **Methods**

39  
40  
41 The study involved the revisit of our published work on individual candidate genes and regions,  
42 studied in North Indian population groups in case-control comparison, for a combined genotype  
43 interaction and for *in-silico* protein-protein interaction and network analysis. The data compiled  
44 was of 2305 samples from Northern India (including 829 Leprosy patients and 1476 unrelated  
45 healthy control subjects from North India) [14 16-18] with a complete coverage of genes  
46 belonging to pro-, anti-inflammatory cytokines, selected HLA regions in 6p21.3 and common  
47 regulatory region of PARK2/PACRG genes located at 6q26 region.  
48  
49  
50  
51  
52  
53  
54

55 The patients' group was classified according to the WHO guidelines. Individual was regarded as  
56 having leprosy if he or she showed skin lesion consistent with leprosy and with definite sensory  
57  
58  
59  
60

1  
2  
3  
4  
5  
6  
7  
8  
9  
10  
11  
12  
13  
14  
15  
16  
17  
18  
19  
20  
21  
22  
23  
24  
25  
26  
27  
28  
29  
30  
31  
32  
33  
34  
35  
36  
37  
38  
39  
40  
41  
42  
43  
44  
45  
46  
47  
48  
49  
50  
51  
52  
53  
54  
55  
56  
57  
58  
59  
60

loss, with or without thickened nerves and positive skin smears test. Further patients were classified as pauci-bacillary (PB) or multi-bacillary (MB) according to the Ridley and Jopling criteria [21], including 421 Pauci-bacillary patients and 408 Multi-bacillary patients, with a mean age of 32.30±3.2 years (range 6-80 years). All these patients were under treatment with multidrug therapy (MDT) specific for multibacillary (MB) and paucibacillary (PB) leprosy, as recommended by the World Health Organization.

For genotype interaction analysis, all possible genotype combinations between selected SNPs (pairwise or multiple genes) were ascertained from a MassArray platform for the given genotypes of SNPs. However, only the combinations of significantly associated SNP genotypes were presented in the Ms for convenience. These interactions were tested using binary logistic regression with the forward likelihood ratio based selection method considering all variables independently and keeping gender as a covariate. In this selection method, entry testing based on the significance of the score statistics and removal testing based on the probability of a likelihood ratio statistics were applied. Furthermore, in multiple gene interaction analysis, all interactions with either risk or protection were combined against other interactions to observe the overall effect of all risk versus protective interactions. These analyses were performed using statistical software package SPSS V.17.0 (SPSS, Chicago III, Illinois, USA) for Windows. *P* Value was considered significant at and below 0.05.

*In-silico* approach to assess the network of the genes in a Protein-Protein Interaction (PPI) of PARK2, using Agile Protein Interaction Database (APID), a comprehensive resource for protein interaction data, automatically accessed by Cytoscape [22] through the dedicated plugin APID2NET [23], was carried out to understand the involvement of the studied interactome. APID integrates in a single web-based tool all known experimentally validated PPI from BIND [24], BioGRID [25], DIP [26], HPRD [27], IntAct [28] and MINT [29] databases.

## Results

The interaction analysis carried out between PARK2 gene regulatory region SNPs (rs9365492 & rs9355403) [18] and SNPs of the anti-inflammatory cytokines [14] provided a significant risk towards the leprosy susceptibility; combining individually with SNPs of IL-10 (OR=1.99), IL-6 (OR=1.33) and TGFBR2 (OR=1.29) cytokine genes. However, with IL10RB (receptor beta), the

1  
2  
3  
4  
5  
6  
7  
8  
9  
10  
11  
12  
13  
14  
15  
16  
17  
18  
19  
20  
21  
22  
23  
24  
25  
26  
27  
28  
29  
30  
31  
32  
33  
34  
35  
36  
37  
38  
39  
40  
41  
42  
43  
44  
45  
46  
47  
48  
49  
50  
51  
52  
53  
54  
55  
56  
57  
58  
59  
60

result showed a significant protection towards the disease (OR=0.61). Similar analysis between PARK2 SNPs with pro-inflammatory cytokine genes TNF-alpha and BTNL2-DRA interval (showing strong LD with the BTNL2 promoter SNPs) [16] provided a significant risk towards leprosy susceptibility with OR=2.10 and OR=5.40, respectively. However, the SNPs of BAT-1, NFKABIL1, LTA, TNF-LTB, IL12B [16 17] provided a significant protection towards leprosy with OR=0.65, OR=0.58, OR=0.61, OR=0.54 and OR=0.71, respectively (Table 1, Figure S1).

In the second step of combined interaction analysis with all the genes, either providing protection or risk towards leprosy, showed that the combined genotypic interaction analysis of the SNP loci PARK2, TNF, BTNL2-DR, IL10, IL-6 and TGFBR2, further increased the risk of leprosy (OR=2.54); and a similar combined analysis for loci PARK2, BAT1, NFKBIL1, LTA, TNF-LTB, IL12B and IL10RB, increased protection towards leprosy (OR=0.26), in comparison to their individual contribution (Table 2 (a, b)). Dividing the patients in pauci-bacillary (PB) and multi-bacillary (MB) subtypes of leprosy revealed PB subtype to carry a higher Risk (OR= 3.02) and Protection (OR= 0.11) towards Leprosy in comparison to MB subtype, for respective combinations.

We further did *in-silico* analysis to identify the Protein-Protein Interaction (PPI) of PARK2. We used APID2NET and Cytoscape tools for PARK2 interaction Data retrieval, providing a total of 43 PARK2 interacting proteins. However, the result did not provide any direct interaction of the PARK2 with the cytokines studied by us in North Indian population [14 16-18]. Further, we considered 43 PARK2 interacting proteins for pathways analysis by using KEGG , BioCarta, Nci-Nature and Reactome tools, resulting these 43 proteins to be involved in 253 different pathways (without removing overlapping pathways). Similarly, in the second step of pathway analysis we considered 11 cytokine proteins studied by us in North Indian population [14 16-18], the results revealed the involvement of 5 cytokine proteins; IL12B, IL6, TNF, TGFR2 & IL10 in 94 pathways, not involving BTNL2, BAT1, NFKBIL, LTA, IL10RB2 & BTNL2-DR in any pathways. Comparing both pathways; 253, PARK2 interacting proteins pathways and 94, cytokine proteins pathways; reveals 27 commonly involved pathways, via CASP8, CUL1, CCNE1 & CCNA proteins, involving only 5 (IL12B, IL6, TNF, TGFR2 & IL10) out of 11 cytokine proteins studied in North Indian population (Figure-1), connecting majorly through Toll-like receptor signaling pathways (Figure 1, Table S1).

## Discussion

Leprosy, an ideal model of a chronic human complex infectious disease, provides an opportunity to dissect the components of the host dependent polygenic susceptibility to this disease. Many loci have been shown to be individually associated and providing the risk towards the disease; justifying to find out interesting gene–gene interactions at different risk loci which may prove to provide a strong association towards the disease susceptibility. In order to understand the role of multiple genes together, an interaction analysis was carried out between the genotype status of functionally different variants of different genetic loci involved in immune response, with an expected combined effect on the outcome of the disease in different polar forms of the disease.

Considering the above facts we first carried out pair-wise interaction analysis of PARK2 gene with pro-/anti- inflammatory cytokine genes (Table 1) followed by multiple gene interaction analysis (Table 2). Analysis of PARK2 with TNF, BTNL2-DR, IL10, IL-6 and TGFBR2, showed an increased risk towards leprosy (OR=2.54 (1.69-3.80),  $p=5.77e-06$ ); while as the combined analysis of PARK2 with BAT1, NFKBIL1, LTA, TNF-LTB, IL12B and IL10RB, showed protection towards the disease (OR=0.26 (0.13-0.51),  $p=1.15e-04$ ). PARK2, encoding E3 ubiquitin ligase protein-parkin, has been shown to be involved in the cellular ubiquitination metabolism [30], providing resistance to intracellular pathogen via ubiquitin mediated autophagy [19], essentially shown to be involved in the host responses to *M. leprae* [31] and for pathogenesis of the disease [8 32]. Recently, parkin protein has shown to be involved to respond to infection in a regulated way by producing important cytokines [20], suppressing molecules that limit pro-inflammatory- IL-2 [33], TNF- alpha cytokine production and enhancing the production of anti-inflammatory cytokines, IL-4, IL-10, and IL-13 [34-39]. All these observations indicate the *in-vivo* importance of PARK2 gene product-parkin to be centrally involved in regulating the production of critical cytokines during immune response against the invading mycobacterium and justifying our study, where combination of risk genotype at different loci of important immune response gene with PARK2 provide increased and significant risk towards this complex disease. These interesting results of gene-gene interaction analysis, suggest seeing the *in-vivo* effect of the invading mycobacterium in future, where immune

1  
2  
3 response to specific antigens is assessed in cells with different background of important  
4 variations in the PARK2 promoter region followed by the effect on the expression levels of pro-  
5 /anti- inflammatory cytokines.  
6  
7  
8

9  
10 An *in-silico* approach to understand the role of immune-regulatory protein-protein interaction  
11 (PPI) between PARK2 and other cytokine genes, an indirect interaction was observed between  
12 PARK2 and IL12B, IL6, TNF, TGFR2 & IL10 genes. All these interactions were found to be  
13 connected with Toll-like receptor signaling pathway (Table S1). As already known that the  
14 polymorphisms in different TLRs, an important molecules of innate immune response are  
15 associated with Leprosy and its subtypes [7 40-44], influencing recognition of *M. Leprae*. A  
16 simultaneous involvement of PARK2, a ubiquitin ligase protein involved in innate immunity by  
17 modulating the production of important cytokines, including IL6 [20]; hints at the involvement  
18 of all these important molecules to be inter-connected through a TLR receptor signaling pathway  
19 to fight against the invading.  
20  
21  
22  
23  
24  
25  
26  
27  
28

29  
30 The above interaction and pathway analysis allows us to propose that the complex genetic  
31 background is the predominant factor for the outcome of the disease, where the combined effect  
32 of the variant risk alleles of the PARK2 gene, responsible for affecting transcription binding site  
33 and lowering the expression of the reporter gene by *in-vitro* experiment [18], along with the risk  
34 alleles of the anti-inflammatory cytokines genes - IL-10, IL-6, TGFBR2, responsible for  
35 lowering the CMI response towards the invading bacteria and pro-inflammatory cytokines -  
36 TNF-alpha; is responsible in providing highly significant risk towards leprosy. The study opens a  
37 way for future *in-vivo* work of immune-response read outs in complex variant genomic  
38 backgrounds to understand the wide gap in understanding the balance in the network of all the  
39 immune regulatory molecules operational in providing either susceptibility or resistance towards  
40 disease.  
41  
42  
43  
44  
45  
46  
47  
48  
49

#### 50 51 **Acknowledgments:**

52  
53  
54 We thank all who participated in the study. Authors thank Dr. Shobit Caroli and Dr. Sudhanshu,  
55 Dr. Shalu the attending physicians at LNJP Hospital and Prof. Jason P. Sinnwell for his  
56 invaluable support in providing Haplo.Stats package.  
57  
58  
59  
60

**Contributorship Statement:** Rameshwar N. K. Bamezai and Rupali Chopra contributed in planning, designing and execution of work and wrote the article; Rupali Chopra, Shafat Ali, Ponnusamy Kalaiarasan Shweta Aggarwal and Amit Kumar Srivastava contributed in biostatistics and in-silico analysis; Vijay K. Garg and S.N. Bhattacharya contributed in patient evaluation, clinical categorization and discussion. All authors critically reviewed the manuscript. Rameshwar N. K. Bamezai led the research effort.

**Data sharing statement:** Extra data is made available by contacting corresponding author at Email ID: bamezai@hotmail.com.

**Funding:** Financial and Infrastructural support for the production of manuscript was provided by Shri Mata Vaishno Devi University, University Grants Commission; and high-throughput project from DBT to the National center of Applied Human Genetics.

**Non-financial competing interests:** No conflict of interest.

**Patient consent:** Obtained.

**Ethics approval:** Approved by Jawaharlal Nehru University ethics committee, New Delhi, India.

**Provenance and peer review:** Not commissioned; externally peer reviewed.

**Figure 1: PARK2 Interaction Analysis:** unfilled circles showing the PARK2 interacting proteins, Light grey circles showing protein links between the PARK2 interacting protein and 5 cytokines protein (dark grey circles) study by us in North India population

**Figure S1: a.** Schematic representation of the genotypic interaction analysis of PARK2 gene regulatory region SNPs rs9365492 and rs9355403 with the SNPs of genes providing Risk toward the Leprosy. Genotypes/Alleles in red color represent risk. **b.** Schematic representation of the genotypic interaction analysis of PARK2 gene regulatory region SNPs; rs9365492 and rs9355403 with the SNPs of gene providing Protection towards the Leprosy. Genotypes/Alleles in red color represent risk.

1  
2  
3  
4  
5  
6  
7  
8  
9  
10  
11  
12  
13  
14  
15  
16  
17  
18  
19  
20  
21  
22  
23  
24  
25  
26  
27  
28  
29  
30  
31  
32  
33  
34  
35  
36  
37  
38  
39  
40  
41  
42  
43  
44  
45  
46  
47  
48  
49  
50  
51  
52  
53  
54  
55  
56  
57  
58  
59  
60

**Table S1:** Pathway analysis of PARK2 interacting protein with Cytokines studied by us in Indian population groups.

For peer review only

**Table 1:** Genotype interaction analysis of PARK2 SNPs with pro-/anti- inflammatory cytokines gene SNPs providing risk/protection towards Leprosy susceptibility

1  
2  
3  
4

| rs9365492; Minor, Risk allele-C | rs9355403; Minor, Risk allele-A | IL-10                           | rs1800871 (-819); Minor, Risk allele-T              | rs1554286 (intron 3 boundary); Minor, Risk allele-T | rs1800872 (-592); Minor, Risk allele-A |          |       |          |       |       |       |
|---------------------------------|---------------------------------|---------------------------------|-----------------------------------------------------|-----------------------------------------------------|----------------------------------------|----------|-------|----------|-------|-------|-------|
| TC+CC                           | GA+AA                           |                                 | CT+TT                                               | TT                                                  | CA+AA                                  | 82       | 84    | 3.22E-05 | 1.997 | 1.441 | 2.767 |
|                                 |                                 | TGFBR2                          | rs2228048 (3' UTR Downstream); Minor, Risk allele-T | rs744751(3' UTR Downstream); Minor, Risk allele-G   |                                        |          |       |          |       |       |       |
|                                 |                                 |                                 | CT+CC                                               | GG                                                  |                                        | 287      | 400   | 1.04E-02 | 1.293 | 1.062 | 1.575 |
|                                 |                                 | IL-6                            | rs1800797 (-718); Minor, Risk allele-G              |                                                     |                                        |          |       |          |       |       |       |
|                                 |                                 |                                 | GG                                                  |                                                     |                                        | 320      | 432   | 2.90E-03 | 1.333 | 1.103 | 1.611 |
|                                 |                                 | TNF                             | rs1800629 (-308); Minor, Risk allele-G              | rs1800610 (Intron-1); Minor, Risk allele-G          |                                        |          |       |          |       |       |       |
|                                 |                                 |                                 | GG                                                  | GG                                                  |                                        | 311      | 420   | 2.06E-09 | 2.103 | 1.649 | 2.682 |
|                                 |                                 | BTNL2-DRA interval              | rs3135365; Minor, Risk allele-C                     | rs7773756; Minor, Risk allele-T                     |                                        |          |       |          |       |       |       |
|                                 | CA+CC                           | CT+TT                           |                                                     | 272                                                 | 269                                    | 1.22E-21 | 5.4   | 3.821    | 7.631 |       |       |
| TT                              | GG                              | LTA                             | rs13192469(13kb upstream); Minor, Risk allele-C     | rs36221459 (-1409); Minor, Risk allele-DEL          |                                        |          |       |          |       |       |       |
|                                 |                                 |                                 | TT                                                  | GTTT                                                |                                        | 240      | 571   | 3.56E-07 | 0.616 | 0.512 | 0.743 |
|                                 |                                 | IL-10RB2                        | rs3171425 (3' UTR); Major, Risk allele-G            | rs7281762 (3' UTR Downstream); Minor, Risk allele-A |                                        |          |       |          |       |       |       |
|                                 |                                 |                                 | GA+AA                                               | GA+GG                                               |                                        | 164      | 391   | 1.10E-05 | 0.61  | 0.489 | 0.76  |
|                                 |                                 | BAT1                            | rs2523504 (-603); Minor, Risk allele-T              |                                                     |                                        |          |       |          |       |       |       |
|                                 |                                 |                                 | CC                                                  |                                                     |                                        | 192      | 475   | 4.15E-05 | 0.645 | 0.523 | 0.795 |
|                                 |                                 | NFKBIL                          | rs2230365 (Exon-3); Minor, Risk allele-T            |                                                     |                                        |          |       |          |       |       |       |
|                                 |                                 |                                 | CC                                                  |                                                     |                                        | 195      | 486   | 1.01E-07 | 0.589 | 0.484 | 0.715 |
|                                 |                                 | TNF-LTB                         | rs769178 (Gene Downstream); Major, Risk allele-G    |                                                     |                                        |          |       |          |       |       |       |
|                                 |                                 |                                 | GT+TT                                               |                                                     |                                        | 66       | 211   | 8.93E-05 | 0.546 | 0.404 | 0.739 |
|                                 | IL12B                           | rs2853694; Major, Risk allele-A |                                                     |                                                     |                                        |          |       |          |       |       |       |
|                                 | CA+CC                           |                                 |                                                     | 233                                                 | 519                                    | 5.03E-04 | 0.705 | 0.579    | 0.858 |       |       |

46  
47  
48  
49



Table 2: Combined interaction analysis of all the SNPs either providing protection or risk towards Leprosy susceptibility

1  
2  
3  
4  
5  
6  
7  
8  
9  
10  
11  
12  
13  
14  
15  
16  
17  
18  
19  
20  
21  
22  
23  
24  
25  
26  
27  
28  
29  
30  
31  
32  
33  
34  
35  
36  
37  
38  
39  
40  
41  
42  
43  
44  
45  
46  
47  
48  
49

a. Analysis of SNPs providing Protection

| Pat | Cont | rs9365492 | rs9355403 | rs2523504 | rs2230365 | rs13192469 | rs36221459 | rs769178 | rs3171425 | rs7281762 | rs2853694 |          |       | Lower | Upper |
|-----|------|-----------|-----------|-----------|-----------|------------|------------|----------|-----------|-----------|-----------|----------|-------|-------|-------|
|     |      | T/C       | G/A       | C/T       | C/T       | T/C        | GTTT/DEL   | G/T      | G/A       | G/A       | A/C       |          |       |       |       |
|     |      | C         | A         | T         | T         | C          | DEL        | G        | G         | A         | A         |          |       |       |       |
| 10  | 59   | TT        | GG        | CC        | CC        | TT         | GTTT       | GT+TT    | GA+AA     | GA+GG     | CA+CC     | 1.15E-04 | 0.263 | 0.133 | 0.518 |
| 2   | 59   | TT        | GG        | CC        | CC        | TT         | GTTT       | GT+TT    | GA+AA     | GA+GG     | CA+CC     | 2.36E-03 | 0.111 | 0.027 | 0.458 |
| NA  |      |           |           |           |           |            |            |          |           |           |           |          |       |       |       |

b. Analysis of SNPs providing Risk

| Pat | Cont | rs9365492 | rs9355403 | rs1800871 | rs1554286 | rs1800872 | rs1800797 | rs2228048 | rs744751 | rs1800629 | rs1800610 | rs3135365 | rs7773756 |          |       | Lower | Upper |
|-----|------|-----------|-----------|-----------|-----------|-----------|-----------|-----------|----------|-----------|-----------|-----------|-----------|----------|-------|-------|-------|
|     |      | T/C       | G/A       | C/T       | C/T       | C/A       | G/A       | C/T       | G/A      | G/A       | G/A       | A/C       | C/T       |          |       |       |       |
|     |      | C         | A         | T         | T         | A         | G         | T         | G        | G         | G         | C         | T         |          |       |       |       |
| 57  | 44   | TC+CC     | GA+AA     | CT+TT     | CT+CC     | CA+AA     | GG        | CT+CC     | GA+AA    | GG        | GG        | CA+CC     | CT+TT     | 5.77E-06 | 2.543 | 1.699 | 3.806 |
| 32  | 44   | TC+CC     | GA+AA     | CT+TT     | CT+CC     | CA+AA     | GG        | CT+CC     | GG       | GG        | GG        | CA+CC     | CT+TT     | 3.73E-06 | 3.028 | 1.894 | 4.843 |
| 25  | 44   | TC+CC     | GA+AA     | CT+TT     | CT+CC     | CA+AA     | GG        | CT+CC     | GG       | GG        | GG        | CA+CC     | CT+TT     | 3.16E-03 | 2.133 | 1.29  | 3.528 |

**References:**

1. Monot M, Honore N, Garnier T, et al. Comparative genomic and phylogeographic analysis of *Mycobacterium leprae*. *Nat Genet* 2009;**41**(12):1282-9 doi: ng.477 [pii] 10.1038/ng.477[published Online First: Epub Date]].
2. Shields ED, Russell DA, Pericak-Vance MA. Genetic epidemiology of the susceptibility to leprosy. *The Journal of clinical investigation* 1987;**79**(4):1139-43 doi: 10.1172/JCI112930[published Online First: Epub Date]].
3. Chakravarti M, Vogel F. A twin study on leprosy. *Topics in human genetics*. Stuttgart, Germany: Georg Thieme Verlag 1973;**1**:1-123
4. Abel L, Demenais F. Detection of major genes for susceptibility to leprosy and its subtypes in a Caribbean island: Desirade island. *American journal of human genetics* 1988;**42**(2):256-66
5. Abel L, Vu DL, Oberti J, et al. Complex segregation analysis of leprosy in southern Vietnam. *Genetic epidemiology* 1995;**12**(1):63-82 doi: 10.1002/gepi.1370120107[published Online First: Epub Date]].
6. Todd JR, West BC, McDonald JC. Human leukocyte antigen and leprosy: study in northern Louisiana and review. *Reviews of infectious diseases* 1990;**12**(1):63-74
7. Wong SH, Gochhait S, Malhotra D, et al. Leprosy and the adaptation of human toll-like receptor 1. *PLoS pathogens* 2010;**6**:e1000979 doi: 10.1371/journal.ppat.1000979[published Online First: Epub Date]].
8. Zhang FR, Huang W, Chen SM, et al. Genomewide association study of leprosy. *The New England journal of medicine* 2009;**361**(27):2609-18 doi: 10.1056/NEJMoa0903753[published Online First: Epub Date]].
9. Fitness J, Tosh K, Hill AV. Genetics of susceptibility to leprosy. *Genes and immunity* 2002;**3**(8):441-53 doi: 10.1038/sj.gene.6363926[published Online First: Epub Date]].
10. Gomolka M, Menninger H, Saal JE, et al. Immunoprinting: various genes are associated with increased risk to develop rheumatoid arthritis in different groups of adult patients. *J Mol Med* 1995;**73**(1):19-29
11. Mok CC, Lanchbury JS, Chan DW, et al. Interleukin-10 promoter polymorphisms in Southern Chinese patients with systemic lupus erythematosus. *Arthritis Rheum* 1998;**41**(6):1090-5 doi: 10.1002/1529-0131(199806)41:6<1090::AID-ART16>3.0.CO;2-6[published Online First: Epub Date]].
12. Loughrey BV, Maxwell AP, Fogarty DG, et al. An interleukin 1B allele, which correlates with a high secretor phenotype, is associated with diabetic nephropathy. *Cytokine* 1998;**10**(12):984-8 doi: S1043-4666(98)90388-X [pii] 10.1006/cyto.1998.0388[published Online First: Epub Date]].
13. Morahan G, Huang D, Wu M, et al. Association of IL12B promoter polymorphism with severity of atopic and non-atopic asthma in children. *Lancet* 2002;**360**(9331):455-9 doi: S0140-6736(02)09676-9 [pii] 10.1016/S0140-6736(02)09676-9[published Online First: Epub Date]].
14. Aggarwal S, Ali S, Chopra R, et al. Genetic variations and interactions in anti-inflammatory cytokine pathway genes in the outcome of leprosy: a study conducted on a MassARRAY platform. *The Journal of infectious diseases* 2011;**204**(8):1264-73 doi: 10.1093/infdis/jir516[published Online First: Epub Date]].

15. Alcais A, Alter A, Antoni G, et al. Stepwise replication identifies a low-producing lymphotoxin-alpha allele as a major risk factor for early-onset leprosy. *Nature genetics* 2007;**39**(4):517-22 doi: 10.1038/ng2000[published Online First: Epub Date]].
16. Ali S, Chopra R, Aggarwal S, et al. Association of variants in BAT1-LTA-TNF-BTNL2 genes within 6p21.3 region show graded risk to leprosy in unrelated cohorts of Indian population. *Human genetics* 2012;**131**(5):703-16 doi: 10.1007/s00439-011-1114-6[published Online First: Epub Date]].
17. Ali S, Srivastava AK, Chopra R, et al. IL12B SNPs and copy number variation in IL23R gene associated with susceptibility to leprosy. *Journal of medical genetics* 2013;**50**(1):34-42 doi: 10.1136/jmedgenet-2012-101214[published Online First: Epub Date]].
18. Chopra R, Ali S, Srivastava AK, et al. Mapping of PARK2 and PACRG Overlapping Regulatory Region Reveals LD Structure and Functional Variants in Association with Leprosy in Unrelated Indian Population Groups. *PLoS genetics* 2013;**9**(7):e1003578 doi: 10.1371/journal.pgen.1003578[published Online First: Epub Date]].
19. Manzanillo PS, Ayres JS, Watson RO, et al. The ubiquitin ligase parkin mediates resistance to intracellular pathogens. *Nature* 2013 doi: 10.1038/nature12566[published Online First: Epub Date]].
20. de Leseleuc L, Orlova M, Cobat A, et al. PARK2 mediates interleukin 6 and monocyte chemoattractant protein 1 production by human macrophages. *PLoS neglected tropical diseases* 2013;**7**(1):e2015 doi: 10.1371/journal.pntd.0002015[published Online First: Epub Date]].
21. Danielssen DC, Boeck W, Losting JL. Om Spedalskhed [on leprosy]. *Christiana Chr Grondahl 1847*
22. Smoot ME, Ono K, Ruschinski J, et al. Cytoscape 2.8: new features for data integration and network visualization. *Bioinformatics* 2011;**27**(3):431-2 doi: 10.1093/bioinformatics/btq675[published Online First: Epub Date]].
23. Hernandez-Toro J, Prieto C, De las Rivas J. APID2NET: unified interactome graphic analyzer. *Bioinformatics* 2007;**23**(18):2495-7 doi: 10.1093/bioinformatics/btm373[published Online First: Epub Date]].
24. Bader GD, Betel D, Hogue CW. BIND: the Biomolecular Interaction Network Database. *Nucleic acids research* 2003;**31**(1):248-50
25. Chatr-Aryamontri A, Breitkreutz BJ, Heinicke S, et al. The BioGRID interaction database: 2013 update. *Nucleic acids research* 2013;**41**(Database issue):D816-23 doi: 10.1093/nar/gks1158[published Online First: Epub Date]].
26. Salwinski L, Miller CS, Smith AJ, et al. The Database of Interacting Proteins: 2004 update. *Nucleic acids research* 2004;**32**(Database issue):D449-51 doi: 10.1093/nar/gkh086[published Online First: Epub Date]].
27. Keshava Prasad TS, Goel R, Kandasamy K, et al. Human Protein Reference Database--2009 update. *Nucleic acids research* 2009;**37**(Database issue):D767-72 doi: 10.1093/nar/gkn892[published Online First: Epub Date]].
28. Kerrien S, Aranda B, Breuza L, et al. The IntAct molecular interaction database in 2012. *Nucleic acids research* 2012;**40**(Database issue):D841-6 doi: 10.1093/nar/gkr1088[published Online First: Epub Date]].
29. Licata L, Briganti L, Peluso D, et al. MINT, the molecular interaction database: 2012 update. *Nucleic acids research* 2012;**40**(Database issue):D857-61 doi: 10.1093/nar/gkr930[published Online First: Epub Date]].
30. Shimura H, Hattori N, Kubo S, et al. Familial Parkinson disease gene product, parkin, is a ubiquitin-protein ligase. *Nature genetics* 2000;**25**(3):302-5 doi: 10.1038/77060[published Online First: Epub Date]].

- 1
- 2
- 3
- 4 31. Mira MT, Alcais A, Nguyen VT, et al. Susceptibility to leprosy is associated with PARK2 and PACRG. *Nature* 2004;**427**(6975):636-40 doi: 10.1038/nature02326[published Online First: Epub Date]].
- 5
- 6 32. Schurr E, Alcais A, de Leseleuc L, et al. Genetic predisposition to leprosy: A major gene reveals novel
- 7 pathways of immunity to *Mycobacterium leprae*. *Seminars in immunology* 2006;**18**(6):404-10
- 8 doi: 10.1016/j.smim.2006.07.005[published Online First: Epub Date]].
- 9 33. Mueller DL. E3 ubiquitin ligases as T cell anergy factors. *Nature immunology* 2004;**5**(9):883-90 doi:
- 10 10.1038/ni1106[published Online First: Epub Date]].
- 11 34. Garcia-Covarrubias L, Manning EW, 3rd, Sorell LT, et al. Ubiquitin enhances the Th2 cytokine
- 12 response and attenuates ischemia-reperfusion injury in the lung. *Critical care medicine*
- 13 2008;**36**(3):979-82 doi: 10.1097/CCM.0B013E318164E417[published Online First: Epub Date]].
- 14 35. Majetschak M. Extracellular ubiquitin: immune modulator and endogenous opponent of damage-
- 15 associated molecular pattern molecules. *Journal of leukocyte biology* 2011;**89**(2):205-19 doi:
- 16 10.1189/jlb.0510316[published Online First: Epub Date]].
- 17 36. Majetschak M, Krehmeier U, Bardenheuer M, et al. Extracellular ubiquitin inhibits the TNF-alpha
- 18 response to endotoxin in peripheral blood mononuclear cells and regulates endotoxin
- 19 hyporesponsiveness in critical illness. *Blood* 2003;**101**(5):1882-90 doi: 10.1182/blood-2002-03-
- 20 0918[published Online First: Epub Date]].
- 21 37. Patel MB, Majetschak M. Distribution and interrelationship of ubiquitin proteasome pathway
- 22 component activities and ubiquitin pools in various porcine tissues. *Physiological research /*
- 23 *Academia Scientiarum Bohemoslovaca* 2007;**56**(3):341-50
- 24 38. Saini V, Romero J, Marchese A, et al. Ubiquitin receptor binding and signaling in primary human
- 25 leukocytes. *Communicative & integrative biology* 2010;**3**(6):608-10 doi:
- 26 10.4161/cib.3.6.13375[published Online First: Epub Date]].
- 27 39. Singh M, Roginskaya M, Dalal S, et al. Extracellular ubiquitin inhibits beta-AR-stimulated apoptosis in
- 28 cardiac myocytes: role of GSK-3beta and mitochondrial pathways. *Cardiovascular research*
- 29 2010;**86**(1):20-8 doi: 10.1093/cvr/cvp402[published Online First: Epub Date]].
- 30 40. Bochud PY, Hawn TR, Siddiqui MR, et al. Toll-like receptor 2 (TLR2) polymorphisms are associated
- 31 with reversal reaction in leprosy. *The Journal of infectious diseases* 2008;**197**(2):253-61 doi:
- 32 10.1086/524688[published Online First: Epub Date]].
- 33 41. Bochud PY, Sinsimer D, Aderem A, et al. Polymorphisms in Toll-like receptor 4 (TLR4) are associated
- 34 with protection against leprosy. *European journal of clinical microbiology & infectious diseases* :
- 35 official publication of the European Society of Clinical Microbiology 2009;**28**(9):1055-65 doi:
- 36 10.1007/s10096-009-0746-0[published Online First: Epub Date]].
- 37 42. Johnson CM, Lyle EA, Omueti KO, et al. Cutting edge: A common polymorphism impairs cell surface
- 38 trafficking and functional responses of TLR1 but protects against leprosy. *J Immunol*
- 39 2007;**178**(12):7520-4
- 40 43. Misch EA, Macdonald M, Ranjit C, et al. Human TLR1 deficiency is associated with impaired
- 41 mycobacterial signaling and protection from leprosy reversal reaction. *PLoS neglected tropical*
- 42 *diseases* 2008;**2**(5):e231 doi: 10.1371/journal.pntd.0000231[published Online First: Epub Date]].
- 43 44. Schuring RP, Hamann L, Faber WR, et al. Polymorphism N248S in the human Toll-like receptor 1 gene
- 44 is related to leprosy and leprosy reactions. *The Journal of infectious diseases*
- 45 2009;**199**(12):1816-9 doi: 10.1086/599121[published Online First: Epub Date]].
- 46
- 47
- 48
- 49
- 50
- 51
- 52
- 53
- 54
- 55
- 56
- 57
- 58
- 59
- 60

1  
2  
3  
4  
5  
6  
7  
8  
9

**Title: PARK2 and pro-/anti- inflammatory cytokine gene interactions  
contribute to the susceptibility to Leprosy – A Case/Control study of North  
Indian population**

10  
11  
12  
13

Rupali Chopra 1, Ponnusamy Kalaiarasan 1, Shafat Ali 2, Amit K. Srivastava 2, Shweta Aggarwal 2, Vijay K. Garg 3, Sambit N. Bhattacharya 4, Rameshwar N. K. Bamezai 2 \*

14  
15  
16  
17

1 Shri Mata Vaishno Devi University, School of Biotechnology, Katra, Jammu & Kashmir, 182320, India

18  
19  
20  
21

2 National Centre of Applied Human Genetics, School of life Sciences, Jawaharlal Nehru University, New Delhi, 110067, India.

22  
23  
24

3 Department of Dermatology and Sexually Transmitted Diseases, Maulana Azad Medical College, Lok Nayak Jai Prakash Hospital, New Delhi, 110002, India.

25  
26  
27  
28

4 Department of Dermatology and Venereology, University College of Medical Sciences and GTB Hospital, Delhi, 110095, India.

29  
30  
31  
32  
33  
34

\*Corresponding author: e-mail address: [bamezai@hotmail.com](mailto:bamezai@hotmail.com), Postal address: Lab No-332, NCAHG, School of Life Sciences, JNU, New Delhi-110067, India. Phone No. 011-26742211.

35  
36

**Abstract**

37  
38  
39  
40  
41  
42  
43  
44  
45  
46  
47  
48

**Objectives:** Cytokines and related molecules in immune-response pathways seem important in deciding the outcome of the host-pathogen interactions towards different polar forms in Leprosy. **Here we study the role of significant and functionally important SNPs in these genes, published independently from our research group,** through combined interaction with an additional analysis of the *in-silico* network outcome, to understand how these impact the susceptibility towards the disease, leprosy.

49  
50  
51  
52  
53  
54  
55  
56  
57  
58  
59  
60

**Design:** Study was designed to assess an overall combined contribution of significantly associated individual SNPs to reflect on epistatic interactions and their outcome in the form of the disease, leprosy. Further *in-silico* approach was adopted to carry out Protein-Protein interaction study between PARK2 and pro-/anti- inflammatory cytokines.

1  
2  
3 **Setting:** Population based case-control study involved the data of North India. Protein-Protein  
4 interaction networks were constructed using Cytoscape.  
5  
6

7 **Participants:** Study included the **data available** from 2305 Northern Indians samples (829  
8 Leprosy Patients; 1476 Healthy controls), **generated by our research group**.  
9  
10

11 **Primary and secondary outcome measures:** For genotype interaction analysis, all possible  
12 genotype combinations between selected SNPs were used as an independent **variable, using**  
13 **binary logistic regression** with the forward likelihood ratio method, keeping the gender as a  
14 covariate.  
15  
16  
17  
18

19 **Results:** **Interaction analysis between PARK2 and significant SNPs of anti-/pro- inflammatory**  
20 **cytokine genes, including (BAT1 to BTNL2-DR) spanning the HLA (6p21.3) region in a case-**  
21 **control comparison, showed that the combined analysis of:** (i) PARK2, TNF, BTNL2-DR, IL10,  
22 IL-6 & TGFBR2 increased the risk towards leprosy (OR=2.54); (ii) PARK2, BAT1, NFKBIL1,  
23 LTA, TNF-LTB, IL12B & IL10RB provided increased protection (OR=0.26) in comparison to  
24 their individual contribution.  
25  
26  
27  
28  
29

30 **Conclusions:** Epistatic SNP-SNP interactions involving PARK2 and cytokine genes provide an  
31 additive risk towards leprosy susceptibility. Further, *in-silico* Protein-Protein Interaction of  
32 PARK2 and important pro-/anti inflammatory molecules indicate that PARK2 is central to  
33 immune regulation, regulating the production of different cytokines upon infection.  
34  
35  
36  
37  
38

39 **Keywords:** PARK2, pro-/anti- inflammatory cytokine genes, Leprosy, Gene interaction  
40  
41

## 42 **Article Summary**

43  
44  
45 Strengths and limitation of this study

- 46  
47 • Many of the genetic studies lack replication in different population groups, explaining the  
48 heterogeneity in associated genes and genomic regions. This may be due to the complex  
49 nature of a disease. The complexity, however, could partly be delineated at genetic level  
50 by assessing the quantum of the contribution of different loci to the disease in a combined  
51 manner instead of their individual role.  
52  
53  
54  
55  
56  
57  
58  
59  
60

- Our study highlights the importance of a combined effect of the important cytokine and other immune regulatory genes, whose combined effect in diverse genotype combinations, provide either increased risk or protection towards the complex genetic disease, Leprosy.
- Genetic interaction and an additional *in-silico* pathway analysis provided an overall perspective on how PARK2 gene product; parkin, acts as a centrally placed molecule, playing an important role in regulating different pathways of the immune response and susceptibility to Leprosy. This conclusion needs further support with future experiments *in vitro* or *in vivo* of T cell responses in different genetic backgrounds of the identified networks in this study.

## Introduction

Leprosy caused by *Mycobacterium leprae* is a chronic infectious disease, characterized by clinically defined polar forms in which pathology and immunology are inextricably related, providing a critical model to explore the immuno-regulatory mechanisms in humans. At one pole, tuberculoid form is associated with a strong cell mediated immunity and T helper 1 (Th1) cytokine profile and at the other end of the spectrum, the lepromatous form is associated with a strong humoral response and T helper 2 (Th2) cytokine profile. Cytokines and other related molecules of the immunological pathways thus seem to be a part of significant group of candidates that are apparently critical for the host-pathogen interactions, where the outcome of the disease is majorly dependent on the host factors controlling the immune response, especially when *M. leprae* possesses lowest level of genetic diversity [1]. This is supported by various studies of familial clustering [2], twin studies [3], complex segregation analysis [4 5], test of analysis with the HLA genes [6] including recent genome-wide association studies, [7 8] and studies of several genes that modulate cell-mediated immunity, with a role in either susceptibility to leprosy per se or to leprosy types [9]. Various candidate gene studies and genome-wide approaches have implicated polymorphisms in cytokine genes, whose protein products are part of important immune modulatory molecules, playing a major role in influencing host-pathogen interactions and determine the outcome of many infectious and autoimmune diseases [10-16]. However, only a few observations have been replicated unequivocally in different population

1  
2  
3 groups, suggesting the polygenic nature of the disease with a high degree of heterogeneity  
4 among different populations.  
5  
6

7  
8 We, in the recent past, have studied various candidate genes of pro-/anti-inflammatory cytokines  
9 in two independent population groups, North and East India-Orissa; and found strong  
10 association with IL-10, IL-10RB, TGFBR2, IL-6 [14], IL-12B [17]. Fine-mapping of a specific  
11 6p (HLA) chromosomal region revealed a significant association of important candidates, BAT1,  
12 LTA, TNF and BTNL2 [16]. In a subsequent study of the 6q chromosomal region, involving the  
13 overlapping regulatory domain of PARK2-PACRG genes, revealed an involvement of significant  
14 SNPs and presence of a differential LD structure in Indian populations as compared to  
15 Vietnamese [18]. The latter observation and the functional role of PARK2, as a ubiquitin ligase,  
16 has recently been shown in providing resistance to intracellular pathogens [19] through ubiquitin  
17 mediated autophagy. Further the involvement of parkin in regulating production of cytokines  
18 upon infection [20], indeed provides strong hint for any functional variation in the gene having  
19 profound effect in modulating the expression of the immune-regulatory genes. The importance of  
20 all the studied genes [14-18] in the network of immune-response necessitated the analysis of an  
21 interaction between these genes as a whole to understand their contribution together towards the  
22 susceptibility of the complex disease, Leprosy; where the outcome of the infection in all  
23 probabilities depends on the nature of gene interactions between the genes with the potential of  
24 contributing to the immune pathology.  
25  
26  
27  
28  
29  
30  
31  
32  
33  
34  
35  
36  
37  
38  
39

40 The aim, therefore, of this study was to assess an overall interaction between the significant and  
41 functionally important SNPs studied in a case-control comparison of the samples from New  
42 Delhi, in Northern India; where most of these SNPs were replicated in an unrelated East Indian-  
43 Orissa population. These included for an overall interaction the PARK2 gene significant SNPs  
44 [18] with the significant SNPs of anti-inflammatory cytokine genes (IL-10, IL-10RB, TGFBR2,  
45 IL-6) [14], pro-inflammatory cytokine genes (TNF-alpha, LT-alpha, IL-12B) and the genes  
46 spanning the HLA region of the chromosome 6p21.3 i.e., BAT1 to BTNL2-DR [16 17] to  
47 evaluate their combined contribution towards the outcome of the complex infectious disease;  
48 Leprosy.  
49  
50  
51  
52  
53  
54  
55  
56  
57  
58  
59  
60



## Methods

The study involved the revisit of our published work on individual candidate genes and regions, studied in North Indian population groups in case-control comparison, for a combined genotype interaction and for *in-silico* protein-protein interaction and network analysis. The data compiled was of 2305 samples from Northern India (including 829 Leprosy patients and 1476 unrelated healthy control subjects from North India) [14 16-18] with a complete coverage of genes belonging to pro-, anti-inflammatory cytokines, selected HLA regions in 6p21.3 and common regulatory region of PARK2/PACRG genes located at 6q26 region.

The patients' group was classified according to the WHO guidelines. Individual was regarded as having leprosy if he or she showed skin lesion consistent with leprosy and with definite sensory loss, with or without thickened nerves and positive skin smears test. Further patients were classified as pauci-bacillary (PB) or multi-bacillary (MB) according to the Ridley and Jopling criteria [21], including 421 Pauci-bacillary patients and 408 Multi-bacillary patients, with a mean age of  $32.30 \pm 3.2$  years (range 6-80 years). All these patients were under treatment with multidrug therapy (MDT) specific for multibacillary (MB) and paucibacillary (PB) leprosy, as recommended by the World Health Organization.

For genotype interaction analysis, all possible genotype combinations between selected SNPs (pairwise or multiple genes) were ascertained from a MassArray platform for the given genotypes of SNPs. However, only the combinations of significantly associated SNP genotypes were presented in the Ms for convenience. These interactions were tested using binary logistic regression with the forward likelihood ratio based selection method considering all variables independently and keeping gender as a covariate. In this selection method, entry testing based on the significance of the score statistics and removal testing based on the probability of a likelihood ratio statistics were applied. Furthermore, in multiple gene interaction analysis, all interactions with either risk or protection were combined against other interactions to observe the overall effect of all risk versus protective interactions. These analyses were performed using statistical software package SPSS V.17.0 (SPSS, Chicago III, Illinois, USA) for Windows. *P* Value was considered significant at and below 0.05.

1  
2  
3  
4  
5  
6  
7  
8  
9  
10  
11  
12  
13  
14  
15  
16  
17  
18  
19  
20  
21  
22  
23  
24  
25  
26  
27  
28  
29  
30  
31  
32  
33  
34  
35  
36  
37  
38  
39  
40  
41  
42  
43  
44  
45  
46  
47  
48  
49  
50  
51  
52  
53  
54  
55  
56  
57  
58  
59  
60

*In-silico* approach to assess the network of the genes in a Protein-Protein Interaction (PPI) of PARK2, using Agile Protein Interaction Database (APID), a comprehensive resource for protein interaction data, automatically accessed by Cytoscape [22] through the dedicated plugin APID2NET [23], was carried out to understand the involvement of the studied interactome. APID integrates in a single web-based tool all known experimentally validated PPI from BIND [24], BioGRID [25], DIP [26], HPRD [27], IntAct [28] and MINT [29] databases.

## Results

The interaction analysis carried out between PARK2 gene regulatory region SNPs (rs9365492 & rs9355403) [18] and SNPs of the anti-inflammatory cytokines [14] provided a significant risk towards the leprosy susceptibility; combining individually with SNPs of IL-10 (OR=1.99), IL-6 (OR=1.33) and TGFBR2 (OR=1.29) cytokine genes. However, with IL10RB (receptor beta), the result showed a significant protection towards the disease (OR=0.61). Similar analysis between PARK2 SNPs with pro-inflammatory cytokine genes TNF-alpha and BTNL2-DRA interval (showing strong LD with the BTNL2 promoter SNPs) [16] provided a significant risk towards leprosy susceptibility with OR=2.10 and OR=5.40, respectively. However, the SNPs of BAT-1, NFKABIL1, LTA, TNF-LTB, IL12B [16 17] provided a significant protection towards leprosy with OR=0.65, OR=0.58, OR=0.61, OR=0.54 and OR=0.71, respectively (Table 1, Figure S1).

In the second step of combined interaction analysis with all the genes, either providing protection or risk towards leprosy, showed that the combined genotypic interaction analysis of the SNP loci PARK2, TNF, BTNL2-DR, IL10, IL-6 and TGFBR2, further increased the risk of leprosy (OR=2.54); and a similar combined analysis for loci PARK2, BAT1, NFKBIL1, LTA, TNF-LTB, IL12B and IL10RB, increased protection towards leprosy (OR=0.26), in comparison to their individual contribution (Table 2 (a, b)). **Dividing the patients in pauci-bacillary (PB) and multi-bacillary (MB) subtypes of leprosy revealed PB subtype to carry a higher Risk (OR= 3.02) and Protection (OR= 0.11) towards Leprosy in comparison to MB subtype, for respective combinations.**

**We further did *in-silico* analysis to identify the Protein-Protein Interaction (PPI) of PARK2.** We used APID2NET and Cytoscape tools for PARK2 interaction Data retrieval, providing a total of 43 PARK2 interacting proteins. However, the result did not provide any direct interaction of the

1  
2  
3  
4  
5  
6  
7  
8  
9  
10  
11  
12  
13  
14  
15  
16  
17  
18  
19  
20  
21  
22  
23  
24  
25  
26  
27  
28  
29  
30  
31  
32  
33  
34  
35  
36  
37  
38  
39  
40  
41  
42  
43  
44  
45  
46  
47  
48  
49  
50  
51  
52  
53  
54  
55  
56  
57  
58  
59  
60

PARK2 with the cytokines studied by us in North Indian population [14 16-18]. Further, we considered 43 PARK2 interacting proteins for pathways analysis by using KEGG , BioCarta, Nci-Nature and Reactome tools, resulting these 43 proteins to be involved in 253 different pathways (without removing overlapping pathways). **Similarly, in the second step of pathway analysis we considered 11 cytokine proteins studied by us in North Indian population [14 16-18], the results revealed the involvement of 5 cytokine proteins; IL12B, IL6, TNF, TGFR2 & IL10 in 94 pathways, not involving BTNL2, BAT1, NFKBIL, LTA, IL10RB2 & BTNL2-DR in any pathways. Comparing both pathways; 253, PARK2 interacting proteins pathways and 94, cytokine proteins pathways; reveals 27 commonly involved pathways, via CASP8, CUL1, CCNE1 & CCNA proteins, involving only 5 (IL12B, IL6, TNF, TGFR2 & IL10) out of 11 cytokine proteins studied in North Indian population (Figure-1), connecting majorly through Toll-like receptor signaling pathways (Figure 1, Table S1).**

## Discussion

30  
31  
32  
33  
34  
35  
36  
37  
38  
39  
40  
41  
42  
43  
44  
45

Leprosy, an ideal model of a chronic human complex infectious disease, provides an opportunity to dissect the components of the host dependent polygenic susceptibility to this disease. **Many loci have been shown to be individually associated and providing the risk towards the disease; justifying to find out interesting gene–gene interactions at different risk loci which may prove to provide a strong association towards the disease susceptibility.** In order to understand the role of multiple genes together, an interaction analysis was carried out between the genotype status of functionally different variants of different genetic loci involved in immune response, with an expected combined effect on the outcome of the disease in different polar forms of the disease.

46  
47  
48  
49  
50  
51  
52  
53  
54  
55  
56  
57  
58  
59  
60

**Considering the above facts we first carried out pair-wise interaction analysis of PARK2 gene with pro-/anti- inflammatory cytokine genes (Table 1) followed by multiple gene interaction analysis (Table 2). Analysis of PARK2 with TNF, BTNL2-DR, IL10, IL-6 and TGFBR2, showed an increased risk towards leprosy (OR=2.54 (1.69-3.80), p=5.77e-06); while as the combined analysis of PARK2 with BAT1, NFKBIL1, LTA, TNF-LTB, IL12B and IL10RB, showed protection towards the disease (OR=0.26 (0.13-0.51), p=1.15e-04). PARK2, encoding E3 ubiquitin ligase protein-parkin, has been shown to be involved in the cellular ubiquitination**

1  
2  
3 metabolism [30], providing resistance to intracellular pathogen via ubiquitin mediated autophagy  
4 [19], essentially shown to be involved in the host responses to *M. leprae* [31] and for  
5 pathogenesis of the disease [8 32]. Recently, parkin protein has shown to be involved to respond  
6 to infection in a regulated way by producing important cytokines [20], suppressing molecules  
7 that limit pro-inflammatory- IL-2 [33], TNF- alpha cytokine production and enhancing the  
8 production of anti-inflammatory cytokines, IL-4, IL-10, and IL-13 [34-39]. All these  
9 observations indicate the *in-vivo* importance of PARK2 gene product-parkin to be centrally  
10 involved in regulating the production of critical cytokines during immune response against the  
11 invading mycobacterium and justifying our study, where combination of risk genotype at  
12 different loci of important immune response gene with PARK2 provide increased and significant  
13 risk towards this complex disease. These interesting results of gene-gene interaction analysis,  
14 suggest seeing the *in-vivo* effect of the invading mycobacterium in future, where immune  
15 response to specific antigens is assessed in cells with different background of important  
16 variations in the PARK2 promoter region followed by the effect on the expression levels of pro-  
17 /anti- inflammatory cytokines.  
18  
19  
20  
21  
22  
23  
24  
25  
26  
27  
28  
29  
30

31  
32 An *in-silico* approach to understand the role of immune-regulatory protein-protein interaction  
33 (PPI) between PARK2 and other cytokine genes, an indirect interaction was observed between  
34 PARK2 and IL12B, IL6, TNF, TGFR2 & IL10 genes. All these interactions were found to be  
35 connected with Toll-like receptor signaling pathway (Table S1). As already known that the  
36 polymorphisms in different TLRs, an important molecules of innate immune response are  
37 associated with Leprosy and its subtypes [7 40-44], influencing recognition of *M. Leprae*. A  
38 simultaneous involvement of PARK2, a ubiquitin ligase protein involved in innate immunity by  
39 modulating the production of important cytokines, including IL6 [20]; hints at the involvement  
40 of all these important molecules to be inter-connected through a TLR receptor signaling pathway  
41 to fight against the invading.  
42  
43  
44  
45  
46  
47  
48  
49  
50

51 The above interaction and pathway analysis allows us to propose that the complex genetic  
52 background is the predominant factor for the outcome of the disease, where the combined effect  
53 of the variant risk alleles of the PARK2 gene, responsible for affecting transcription binding site  
54 and lowering the expression of the reporter gene by *in-vitro* experiment [18], along with the risk  
55  
56  
57  
58  
59  
60

1  
2  
3 alleles of the anti-inflammatory cytokines genes - IL-10, IL-6, TGFBR2, responsible for  
4 lowering the CMI response towards the invading bacteria and pro-inflammatory cytokines -  
5 TNF-alpha; is responsible in providing highly significant risk towards leprosy. The study opens a  
6 way for future *in-vivo* work of immune-response read outs in complex variant genomic  
7 backgrounds to understand the wide gap in understanding the balance in the network of all the  
8 immune regulatory molecules operational in providing either susceptibility or resistance towards  
9 disease.  
10  
11  
12  
13  
14

15  
16  
17  
18 **Acknowledgments:**  
19

20 We thank all who participated in the study. Authors thank Dr. Shobit Caroli and Dr. Sudhanshu,  
21 Dr. Shalu the attending physicians at LNJP Hospital and Prof. Jason P. Sinnwell for his  
22 invaluable support in providing Haplo.Stats package.  
23  
24  
25

26 **Contributorship Statement:** Rameshwar N. K. Bamezai and Rupali Chopra contributed in  
27 planning, designing and execution of work and wrote the article; Rupali Chopra, Shafat Ali,  
28 Ponnusamy Kalaiarasan Shweta Aggarwal and Amit Kumar Srivastava contributed in  
29 biostatistics and in-silico analysis; Vijay K. Garg and S.N. Bhattacharya contributed in patient  
30 evaluation, clinical categorization and discussion. All authors critically reviewed the manuscript.  
31 Rameshwar N. K. Bamezai led the research effort.  
32  
33  
34  
35  
36

37 **Data sharing statement:** Extra data is made available by contacting corresponding author at  
38 Email ID: bamezai@hotmail.com.  
39  
40  
41

42 **Funding:** Financial and Infrastructural support for the production of manuscript was provided by  
43 Shri Mata Vaishno Devi University, University Grants Commission; and high-throughput project  
44 from DBT to the National center of Applied Human Genetics.  
45  
46  
47

48 **Non-financial competing interests:** No conflict of interest.  
49

50 **Patient consent:** Obtained.  
51

52 **Ethics approval:** Approved by Jawaharlal Nehru University ethics committee, New Delhi,  
53 India.  
54  
55  
56  
57  
58  
59  
60

1  
2  
3 **Provenance and peer review:** Not commissioned; externally peer reviewed.  
4  
5

6 **Figure 1: PARK2 Interaction Analysis:** unfilled circles showing the PARK2 interacting  
7 proteins, Light grey circles showing protein links between the PARK2 interacting protein and 5  
8 cytokines protein (dark grey circles) study by us in North India population  
9  
10

11  
12  
13 **Figure S1: a.** Schematic representation of the genotypic interaction analysis of PARK2 gene  
14 regulatory region SNPs rs9365492 and rs9355403 with the SNPs of gens providing Risk toward  
15 the Leprosy. Genotypes/Alleles in red color represent risk. **b.** Schematic representation of the  
16 genotypic interaction analysis of PARK2 gene regulatory region SNPs; rs9365492 and  
17 rs9355403 with the SNPs of gene providing Protection towards the Leprosy. Genotypes/Alleles  
18 in red color represent risk.  
19  
20  
21  
22  
23

24 **Table S1:** Pathway analysis of PARK2 interacting protein with Cytokines studied by us in  
25 Indian population groups.  
26  
27  
28  
29  
30  
31  
32  
33  
34  
35  
36  
37  
38  
39  
40  
41  
42  
43  
44  
45  
46  
47  
48  
49  
50  
51  
52  
53  
54  
55  
56  
57  
58  
59  
60

1  
2  
3  
4

**Table 1:** Genotype interaction analysis of PARK2 SNPs with pro-/anti- inflammatory cytokines gene SNPs providing risk/protection towards Leprosy susceptibility

| PARK2 (SNPs are within 63.8kb upstream gene region) |                                 | GENE                            | SNPs PROVIDING RISK                                 |                                                     |                                        | No. of Samples |           | Sig.     | OR    | 95% C.I.for EXP(B) |       |
|-----------------------------------------------------|---------------------------------|---------------------------------|-----------------------------------------------------|-----------------------------------------------------|----------------------------------------|----------------|-----------|----------|-------|--------------------|-------|
|                                                     |                                 |                                 |                                                     |                                                     |                                        | Patients       | Contr ols |          |       | Lower              | Upper |
| rs9365492; Minor, Risk allele-C                     | rs9355403; Minor, Risk allele-A | IL-10                           | rs1800871 (-819); Minor, Risk allele-T              | rs1554286 (intron 3 boundary); Minor, Risk allele-T | rs1800872 (-592); Minor, Risk allele-A |                |           |          |       |                    |       |
| TC+CC                                               | GA+AA                           |                                 | CT+TT                                               | TT                                                  | CA+AA                                  | 82             | 84        | 3.22E-05 | 1.997 | 1.441              | 2.767 |
|                                                     |                                 | TGFBR2                          | rs2228048 (3' UTR Downstream); Minor, Risk allele-T | rs744751(3' UTR Downstream); Minor, Risk allele-G   |                                        |                |           |          |       |                    |       |
|                                                     |                                 |                                 | CT+CC                                               | GG                                                  |                                        | 287            | 400       | 1.04E-02 | 1.293 | 1.062              | 1.575 |
|                                                     |                                 | IL-6                            | rs1800797 (-718); Minor, Risk allele-G              |                                                     |                                        |                |           |          |       |                    |       |
|                                                     |                                 |                                 | GG                                                  |                                                     |                                        | 320            | 432       | 2.90E-03 | 1.333 | 1.103              | 1.611 |
|                                                     |                                 | TNF                             | rs1800629 (-308); Minor, Risk allele-G              | rs1800610 (Intron-1); Minor, Risk allele-G          |                                        |                |           |          |       |                    |       |
|                                                     |                                 |                                 | GG                                                  | GG                                                  |                                        | 311            | 420       | 2.06E-09 | 2.103 | 1.649              | 2.682 |
|                                                     |                                 | BTNL2-DRA interval              | rs3135365; Minor, Risk allele-C                     | rs7773756; Minor, Risk allele-T                     |                                        |                |           |          |       |                    |       |
|                                                     | CA+CC                           | CT+TT                           |                                                     | 272                                                 | 269                                    | 1.22E-21       | 5.4       | 3.821    | 7.631 |                    |       |
| <b>SNPs PROVIDING PROTECTION</b>                    |                                 |                                 |                                                     |                                                     |                                        |                |           |          |       |                    |       |
| TT                                                  | GG                              | LTA                             | rs13192469(13kb upstream); Minor, Risk allele-C     | rs36221459 (-1409); Minor, Risk allele-DEL          |                                        |                |           |          |       |                    |       |
|                                                     |                                 |                                 | TT                                                  | GTTT                                                |                                        | 240            | 571       | 3.56E-07 | 0.616 | 0.512              | 0.743 |
|                                                     |                                 | IL-10RB2                        | rs3171425 (3' UTR); Major, Risk allele-G            | rs7281762 (3' UTR Downstream); Minor, Risk allele-A |                                        |                |           |          |       |                    |       |
|                                                     |                                 |                                 | GA+AA                                               | GA+GG                                               |                                        | 164            | 391       | 1.10E-05 | 0.61  | 0.489              | 0.76  |
|                                                     |                                 | BAT1                            | rs2523504 (-603); Minor, Risk allele-T              |                                                     |                                        |                |           |          |       |                    |       |
|                                                     |                                 |                                 | CC                                                  |                                                     |                                        | 192            | 475       | 4.15E-05 | 0.645 | 0.523              | 0.795 |
|                                                     |                                 | NFKBIL                          | rs2230365 (Exon-3); Minor, Risk allele-T            |                                                     |                                        |                |           |          |       |                    |       |
|                                                     |                                 |                                 | CC                                                  |                                                     |                                        | 195            | 486       | 1.01E-07 | 0.589 | 0.484              | 0.715 |
|                                                     |                                 | TNF-LTB                         | rs769178 (Gene Downstream); Major, Risk allele-G    |                                                     |                                        |                |           |          |       |                    |       |
|                                                     |                                 |                                 | GT+TT                                               |                                                     |                                        | 66             | 211       | 8.93E-05 | 0.546 | 0.404              | 0.739 |
|                                                     | IL12B                           | rs2853694; Major, Risk allele-A |                                                     |                                                     |                                        |                |           |          |       |                    |       |
|                                                     | CA+CC                           |                                 |                                                     |                                                     | 233                                    | 519            | 5.03E-04  | 0.705    | 0.579 | 0.858              |       |

45  
46  
47  
48  
49

**Table 2:** Combined interaction analysis of all the SNPs either providing protection or risk towards Leprosy susceptibility

a. Analysis of SNPs providing Protection

|             | No. of Samples |      | PARK2     | PARK2     | BAT1 Promoter | NFKBIL    | LTA 13kb upstream | LTA Promoter | TNF-LTB  | IL10RB    | IL10RB    | IL12B     | Sig.     | OR    | 95% C.I.for EXP(B) |       |
|-------------|----------------|------|-----------|-----------|---------------|-----------|-------------------|--------------|----------|-----------|-----------|-----------|----------|-------|--------------------|-------|
|             | Pat            | Cont | rs9365492 | rs9355403 | rs2523504     | rs2230365 | rs13192469        | rs36221459   | rs769178 | rs3171425 | rs7281762 | rs2853694 |          |       | Lower              | Upper |
| Alleles     |                |      | T/C       | G/A       | C/T           | C/T       | T/C               | GTTT/DEL     | G/T      | G/A       | G/A       | A/C       |          |       |                    |       |
| Risk Allele |                |      | C         | A         | T             | T         | C                 | DEL          | G        | G         | A         | A         |          |       |                    |       |
| TOTAL       | 10             | 59   | TT        | GG        | CC            | CC        | TT                | GTTT         | GT+TT    | GA+AA     | GA+GG     | CA+CC     | 1.15E-04 | 0.263 | 0.133              | 0.518 |
| PB/HC       | 2              | 59   | TT        | GG        | CC            | CC        | TT                | GTTT         | GT+TT    | GA+AA     | GA+GG     | CA+CC     | 2.36E-03 | 0.111 | 0.027              | 0.458 |
| MB/HC       | NA             |      |           |           |               |           |                   |              |          |           |           |           |          |       |                    |       |

b. Analysis of SNPs providing Risk

|             | No. of Samples |      | PARK2     | PARK2     | IL-10     | IL-10     | IL-10     | IL-6      | TGFBR2    | TGFBR2   | TNF (-308) Promoter | TNF intron1 | BTNL2-DRA interval | BTNL2-DRA interval | Sig.     | OR    | 95% C.I.for EXP(B) |       |
|-------------|----------------|------|-----------|-----------|-----------|-----------|-----------|-----------|-----------|----------|---------------------|-------------|--------------------|--------------------|----------|-------|--------------------|-------|
|             | Pat            | Cont | rs9365492 | rs9355403 | rs1800871 | rs1554286 | rs1800872 | rs1800797 | rs2228048 | rs744751 | rs1800629           | rs1800610   | rs3135365          | rs7773756          |          |       | Lower              | Upper |
| Alleles     |                |      | T/C       | G/A       | C/T       | C/T       | C/A       | G/A       | C/T       | G/A      | G/A                 | G/A         | A/C                | C/T                |          |       |                    |       |
| Risk Allele |                |      | C         | A         | T         | T         | A         | G         | T         | G        | G                   | G           | C                  | T                  |          |       |                    |       |
| Total       | 57             | 44   | TC+CC     | GA+AA     | CT+TT     | CT+CC     | CA+AA     | GG        | CT+CC     | GA+AA    | GG                  | GG          | CA+CC              | CT+TT              | 5.77E-06 | 2.543 | 1.699              | 3.806 |
| PB/HC       | 32             | 44   | TC+CC     | GA+AA     | CT+TT     | CT+CC     | CA+AA     | GG        | CT+CC     | GG       | GG                  | GG          | CA+CC              | CT+TT              | 3.73E-06 | 3.028 | 1.894              | 4.843 |
| MB/HC       | 25             | 44   | TC+CC     | GA+AA     | CT+TT     | CT+CC     | CA+AA     | GG        | CT+CC     | GG       | GG                  | GG          | CA+CC              | CT+TT              | 3.16E-03 | 2.133 | 1.29               | 3.528 |



**References:**

1. Monot M, Honore N, Garnier T, et al. Comparative genomic and phylogeographic analysis of *Mycobacterium leprae*. *Nat Genet* 2009;**41**(12):1282-9 doi: ng.477 [pii] 10.1038/ng.477[published Online First: Epub Date]].
2. Shields ED, Russell DA, Pericak-Vance MA. Genetic epidemiology of the susceptibility to leprosy. *The Journal of clinical investigation* 1987;**79**(4):1139-43 doi: 10.1172/JCI112930[published Online First: Epub Date]].
3. Chakravarti M, Vogel F. A twin study on leprosy. *Topics in human genetics*. Stuttgart, Germany: Georg Thieme Verlag 1973;**1**:1-123
4. Abel L, Demenais F. Detection of major genes for susceptibility to leprosy and its subtypes in a Caribbean island: Desirade island. *American journal of human genetics* 1988;**42**(2):256-66
5. Abel L, Vu DL, Oberti J, et al. Complex segregation analysis of leprosy in southern Vietnam. *Genetic epidemiology* 1995;**12**(1):63-82 doi: 10.1002/gepi.1370120107[published Online First: Epub Date]].
6. Todd JR, West BC, McDonald JC. Human leukocyte antigen and leprosy: study in northern Louisiana and review. *Reviews of infectious diseases* 1990;**12**(1):63-74
7. Wong SH, Gochhait S, Malhotra D, et al. Leprosy and the adaptation of human toll-like receptor 1. *PLoS pathogens* 2010;**6**:e1000979 doi: 10.1371/journal.ppat.1000979[published Online First: Epub Date]].
8. Zhang FR, Huang W, Chen SM, et al. Genomewide association study of leprosy. *The New England journal of medicine* 2009;**361**(27):2609-18 doi: 10.1056/NEJMoa0903753[published Online First: Epub Date]].
9. Fitness J, Tosh K, Hill AV. Genetics of susceptibility to leprosy. *Genes and immunity* 2002;**3**(8):441-53 doi: 10.1038/sj.gene.6363926[published Online First: Epub Date]].
10. Gomolka M, Menninger H, Saal JE, et al. Immunoprinting: various genes are associated with increased risk to develop rheumatoid arthritis in different groups of adult patients. *J Mol Med* 1995;**73**(1):19-29
11. Mok CC, Lanchbury JS, Chan DW, et al. Interleukin-10 promoter polymorphisms in Southern Chinese patients with systemic lupus erythematosus. *Arthritis Rheum* 1998;**41**(6):1090-5 doi: 10.1002/1529-0131(199806)41:6<1090::AID-ART16>3.0.CO;2-6[published Online First: Epub Date]].
12. Loughrey BV, Maxwell AP, Fogarty DG, et al. An interleukin 1B allele, which correlates with a high secretor phenotype, is associated with diabetic nephropathy. *Cytokine* 1998;**10**(12):984-8 doi: S1043-4666(98)90388-X [pii] 10.1006/cyto.1998.0388[published Online First: Epub Date]].
13. Morahan G, Huang D, Wu M, et al. Association of IL12B promoter polymorphism with severity of atopic and non-atopic asthma in children. *Lancet* 2002;**360**(9331):455-9 doi: S0140-6736(02)09676-9 [pii] 10.1016/S0140-6736(02)09676-9[published Online First: Epub Date]].
14. Aggarwal S, Ali S, Chopra R, et al. Genetic variations and interactions in anti-inflammatory cytokine pathway genes in the outcome of leprosy: a study conducted on a MassARRAY platform. *The Journal of infectious diseases* 2011;**204**(8):1264-73 doi: 10.1093/infdis/jir516[published Online First: Epub Date]].

15. Alcais A, Alter A, Antoni G, et al. Stepwise replication identifies a low-producing lymphotoxin-alpha allele as a major risk factor for early-onset leprosy. *Nature genetics* 2007;**39**(4):517-22 doi: 10.1038/ng2000[published Online First: Epub Date]].
16. Ali S, Chopra R, Aggarwal S, et al. Association of variants in BAT1-LTA-TNF-BTNL2 genes within 6p21.3 region show graded risk to leprosy in unrelated cohorts of Indian population. *Human genetics* 2012;**131**(5):703-16 doi: 10.1007/s00439-011-1114-6[published Online First: Epub Date]].
17. Ali S, Srivastava AK, Chopra R, et al. IL12B SNPs and copy number variation in IL23R gene associated with susceptibility to leprosy. *Journal of medical genetics* 2013;**50**(1):34-42 doi: 10.1136/jmedgenet-2012-101214[published Online First: Epub Date]].
18. Chopra R, Ali S, Srivastava AK, et al. Mapping of PARK2 and PACRG Overlapping Regulatory Region Reveals LD Structure and Functional Variants in Association with Leprosy in Unrelated Indian Population Groups. *PLoS genetics* 2013;**9**(7):e1003578 doi: 10.1371/journal.pgen.1003578[published Online First: Epub Date]].
19. Manzanillo PS, Ayres JS, Watson RO, et al. The ubiquitin ligase parkin mediates resistance to intracellular pathogens. *Nature* 2013 doi: 10.1038/nature12566[published Online First: Epub Date]].
20. de Leseleuc L, Orlova M, Cobat A, et al. PARK2 mediates interleukin 6 and monocyte chemoattractant protein 1 production by human macrophages. *PLoS neglected tropical diseases* 2013;**7**(1):e2015 doi: 10.1371/journal.pntd.0002015[published Online First: Epub Date]].
21. Danielssen DC, Boeck W, Losting JL. Om Spedalskhed [on leprosy]. *Christiana Chr Grondahl 1847*
22. Smoot ME, Ono K, Ruschinski J, et al. Cytoscape 2.8: new features for data integration and network visualization. *Bioinformatics* 2011;**27**(3):431-2 doi: 10.1093/bioinformatics/btq675[published Online First: Epub Date]].
23. Hernandez-Toro J, Prieto C, De las Rivas J. APID2NET: unified interactome graphic analyzer. *Bioinformatics* 2007;**23**(18):2495-7 doi: 10.1093/bioinformatics/btm373[published Online First: Epub Date]].
24. Bader GD, Betel D, Hogue CW. BIND: the Biomolecular Interaction Network Database. *Nucleic acids research* 2003;**31**(1):248-50
25. Chatr-Aryamontri A, Breitkreutz BJ, Heinicke S, et al. The BioGRID interaction database: 2013 update. *Nucleic acids research* 2013;**41**(Database issue):D816-23 doi: 10.1093/nar/gks1158[published Online First: Epub Date]].
26. Salwinski L, Miller CS, Smith AJ, et al. The Database of Interacting Proteins: 2004 update. *Nucleic acids research* 2004;**32**(Database issue):D449-51 doi: 10.1093/nar/gkh086[published Online First: Epub Date]].
27. Keshava Prasad TS, Goel R, Kandasamy K, et al. Human Protein Reference Database--2009 update. *Nucleic acids research* 2009;**37**(Database issue):D767-72 doi: 10.1093/nar/gkn892[published Online First: Epub Date]].
28. Kerrien S, Aranda B, Breuza L, et al. The IntAct molecular interaction database in 2012. *Nucleic acids research* 2012;**40**(Database issue):D841-6 doi: 10.1093/nar/gkr1088[published Online First: Epub Date]].
29. Licata L, Briganti L, Peluso D, et al. MINT, the molecular interaction database: 2012 update. *Nucleic acids research* 2012;**40**(Database issue):D857-61 doi: 10.1093/nar/gkr930[published Online First: Epub Date]].
30. Shimura H, Hattori N, Kubo S, et al. Familial Parkinson disease gene product, parkin, is a ubiquitin-protein ligase. *Nature genetics* 2000;**25**(3):302-5 doi: 10.1038/77060[published Online First: Epub Date]].

- 1
- 2
- 3
- 4 31. Mira MT, Alcais A, Nguyen VT, et al. Susceptibility to leprosy is associated with PARK2 and PACRG. *Nature* 2004;**427**(6975):636-40 doi: 10.1038/nature02326[published Online First: Epub Date]].
- 5
- 6 32. Schurr E, Alcais A, de Leseleuc L, et al. Genetic predisposition to leprosy: A major gene reveals novel
- 7 pathways of immunity to *Mycobacterium leprae*. *Seminars in immunology* 2006;**18**(6):404-10
- 8 doi: 10.1016/j.smim.2006.07.005[published Online First: Epub Date]].
- 9 33. Mueller DL. E3 ubiquitin ligases as T cell anergy factors. *Nature immunology* 2004;**5**(9):883-90 doi:
- 10 10.1038/ni1106[published Online First: Epub Date]].
- 11 34. Garcia-Covarrubias L, Manning EW, 3rd, Sorell LT, et al. Ubiquitin enhances the Th2 cytokine
- 12 response and attenuates ischemia-reperfusion injury in the lung. *Critical care medicine*
- 13 2008;**36**(3):979-82 doi: 10.1097/CCM.0B013E318164E417[published Online First: Epub Date]].
- 14 35. Majetschak M. Extracellular ubiquitin: immune modulator and endogenous opponent of damage-
- 15 associated molecular pattern molecules. *Journal of leukocyte biology* 2011;**89**(2):205-19 doi:
- 16 10.1189/jlb.0510316[published Online First: Epub Date]].
- 17 36. Majetschak M, Krehmeier U, Bardenheuer M, et al. Extracellular ubiquitin inhibits the TNF-alpha
- 18 response to endotoxin in peripheral blood mononuclear cells and regulates endotoxin
- 19 hyporesponsiveness in critical illness. *Blood* 2003;**101**(5):1882-90 doi: 10.1182/blood-2002-03-
- 20 0918[published Online First: Epub Date]].
- 21 37. Patel MB, Majetschak M. Distribution and interrelationship of ubiquitin proteasome pathway
- 22 component activities and ubiquitin pools in various porcine tissues. *Physiological research /*
- 23 *Academia Scientiarum Bohemoslovaca* 2007;**56**(3):341-50
- 24 38. Saini V, Romero J, Marchese A, et al. Ubiquitin receptor binding and signaling in primary human
- 25 leukocytes. *Communicative & integrative biology* 2010;**3**(6):608-10 doi:
- 26 10.4161/cib.3.6.13375[published Online First: Epub Date]].
- 27 39. Singh M, Roginskaya M, Dalal S, et al. Extracellular ubiquitin inhibits beta-AR-stimulated apoptosis in
- 28 cardiac myocytes: role of GSK-3beta and mitochondrial pathways. *Cardiovascular research*
- 29 2010;**86**(1):20-8 doi: 10.1093/cvr/cvp402[published Online First: Epub Date]].
- 30 40. Bochud PY, Hawn TR, Siddiqui MR, et al. Toll-like receptor 2 (TLR2) polymorphisms are associated
- 31 with reversal reaction in leprosy. *The Journal of infectious diseases* 2008;**197**(2):253-61 doi:
- 32 10.1086/524688[published Online First: Epub Date]].
- 33 41. Bochud PY, Sinsimer D, Aderem A, et al. Polymorphisms in Toll-like receptor 4 (TLR4) are associated
- 34 with protection against leprosy. *European journal of clinical microbiology & infectious diseases* :
- 35 official publication of the European Society of Clinical Microbiology 2009;**28**(9):1055-65 doi:
- 36 10.1007/s10096-009-0746-0[published Online First: Epub Date]].
- 37 42. Johnson CM, Lyle EA, Omueti KO, et al. Cutting edge: A common polymorphism impairs cell surface
- 38 trafficking and functional responses of TLR1 but protects against leprosy. *J Immunol*
- 39 2007;**178**(12):7520-4
- 40 43. Misch EA, Macdonald M, Ranjit C, et al. Human TLR1 deficiency is associated with impaired
- 41 mycobacterial signaling and protection from leprosy reversal reaction. *PLoS neglected tropical*
- 42 *diseases* 2008;**2**(5):e231 doi: 10.1371/journal.pntd.0000231[published Online First: Epub Date]].
- 43 44. Schuring RP, Hamann L, Faber WR, et al. Polymorphism N248S in the human Toll-like receptor 1 gene
- 44 is related to leprosy and leprosy reactions. *The Journal of infectious diseases*
- 45 2009;**199**(12):1816-9 doi: 10.1086/599121[published Online First: Epub Date]].
- 46
- 47
- 48
- 49
- 50
- 51
- 52
- 53
- 54
- 55
- 56
- 57
- 58
- 59
- 60



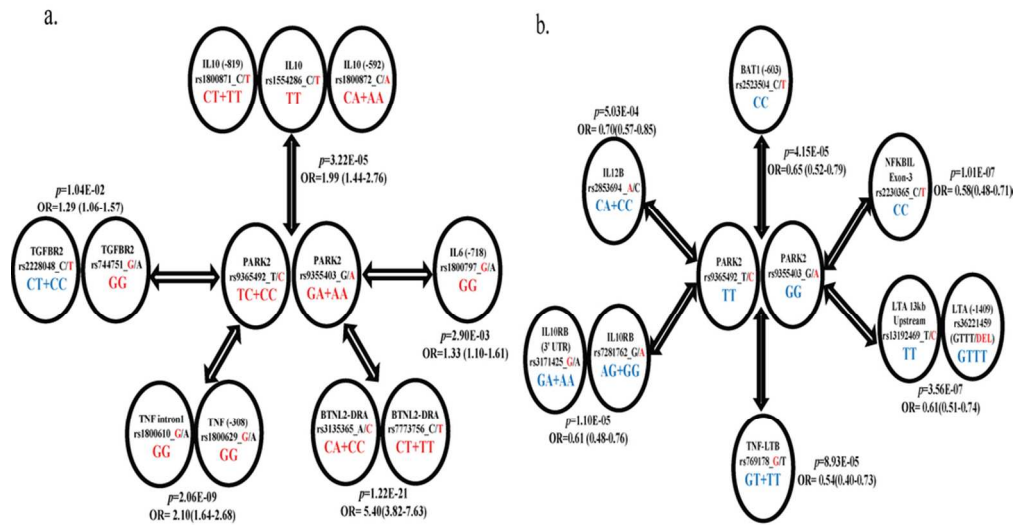

Figure S1  
89x46mm (300 x 300 DPI)

**Table S1:** Pathway analysis of PARK2 interacting protein with Cytokines studied by us in Indian population groups

| PARK2-interacting proteins | Uniport_ID of PARK2 interacting proteins | PATHWAYS involving PARK2 interacting proteins and Cytokine genes | Cytokine genes   | Databases used for Pathways retrieval |
|----------------------------|------------------------------------------|------------------------------------------------------------------|------------------|---------------------------------------|
| CUL1                       | Q13616                                   | Adherens junction                                                | TGFR2            | KEGG                                  |
| VINC                       | P18206                                   | Adherens junction                                                | TGFR2            | KEGG                                  |
| CUL1                       | Q13616                                   | Amyotrophic lateral sclerosis (ALS)                              | TNF              | KEGG                                  |
| NMDE2                      | Q13224                                   | Amyotrophic lateral sclerosis (ALS)                              | TNF              | KEGG                                  |
| CUL1                       | Q13616                                   | Angiopoietin receptor Tie2-mediated signaling                    | TNF              | Nci-Nature                            |
| CASP8                      | Q14790                                   | Apoptosis                                                        | TNF              | KEGG                                  |
| CASP8                      | Q14790                                   | caspase cascade in apoptosis                                     | TNF              | BioCarta                              |
| CASP8                      | Q14790                                   | Caspase cascade in apoptosis                                     | TNF              | Nci-Nature                            |
| CASP1                      | P29466                                   | caspase cascade in apoptosis                                     | TNF              | BioCarta                              |
| CASP1                      | P29466                                   | Caspase cascade in apoptosis                                     | TNF              | Nci-Nature                            |
| CASP1                      | P29466                                   | Cellular roles of Anthrax toxin                                  | TNF              | Nci-Nature                            |
| CASP8                      | Q14790                                   | ceramide signaling pathway                                       | TNF              | BioCarta                              |
| CASP8                      | Q14790                                   | Ceramide signaling pathway                                       | TNF              | Nci-Nature                            |
| CASP8                      | Q14790                                   | Chagas disease                                                   | IL10, TGFR2, TNF | KEGG                                  |
| CUL1                       | Q13616                                   | Fc epsilon RI signaling pathway                                  | TNF              | KEGG                                  |
| CASP8                      | Q14790                                   | hiv-1 nef: negative effector of fas and tnf                      | TNF              | BioCarta                              |
| CASP8                      | Q14790                                   | HIV-1 Nef: Negative effector of Fas and TNF-alpha                | TNF              | Nci-Nature                            |
| CUL1                       | Q13616                                   | IL6-mediated signaling events                                    | IL6              | Nci-Nature                            |
| CUL1                       | Q13616                                   | Integrins in angiogenesis                                        | TGFR2            | Nci-Nature                            |
| CASP8                      | Q14790                                   | Integrins in angiogenesis                                        | TGFR2            | Nci-Nature                            |
| VINC                       | P18206                                   | Integrins in angiogenesis                                        | TGFR2            | Nci-Nature                            |
| CUL1                       | Q13616                                   | LPA receptor mediated events                                     | IL6              | Nci-Nature                            |

1  
2  
3  
4  
5  
6  
7  
8  
9  
10  
11  
12  
13  
14  
15  
16  
17  
18  
19  
20  
21  
22  
23  
24  
25  
26  
27  
28  
29  
30  
31  
32  
33  
34  
35  
36  
37  
38  
39  
40  
41  
42  
43  
44  
45  
46  
47  
48  
49

|       |        |                                           |                 |            |
|-------|--------|-------------------------------------------|-----------------|------------|
| CUL1  | Q13616 | MAPK signaling pathway                    | TGFR2, TNF      | KEGG       |
| CUL1  | Q13616 | Natural killer cell mediated cytotoxicity | TNF             | KEGG       |
| RBP2  | P49792 | Signaling events mediated by HDAC Class I | TNF             | Nci-Nature |
| CSKP  | O14936 | Syndecan-1-mediated signaling events      | TGFR2           | Nci-Nature |
| KCC2A | Q9UQM7 | TGF-beta receptor signaling               | TGFR2           | Nci-Nature |
| CUL1  | Q13616 | TGF-beta signaling pathway                | TGFR2, TNF      | KEGG       |
| CASP8 | Q14790 | TNF receptor signaling pathway            | TNF             | Nci-Nature |
| CASP8 | Q14790 | TNF signaling                             | TNF             | Reactome   |
| CASP8 | Q14790 | tnfr1 signaling pathway                   | TNF             | BioCarta   |
| CUL1  | Q13616 | Toll-like receptor signaling pathway      | IL6, TNF, IL12B | KEGG       |
| CASP8 | Q14790 | Toll-like receptor signaling pathway      | IL6, TNF, IL12B | KEGG       |
