# Supplementary material for: PARK2 and proinflammatory/anti-inflammatory cytokine gene interactions contribute to the susceptibility to leprosy: a case–control study of North Indian population
Source: HighWire-hosted journal article supplement (doi:10.1136/bmjopen-2013-004239), 2014-02-01

**Figure S1: a.** Schematic representation of the genotypic interaction analysis of PARK2 gene regulatory region SNPs rs9365492 and rs9355403 with the SNPs of genes providing Risk toward the Leprosy. Genotypes/Alleles in red color represent risk. **b.** Schematic representation of the genotypic interaction analysis of PARK2 gene regulatory region SNPs; rs9365492 and rs9355403 with the SNPs of gene providing Protection towards the Leprosy. Genotypes/Alleles in red color represent risk.

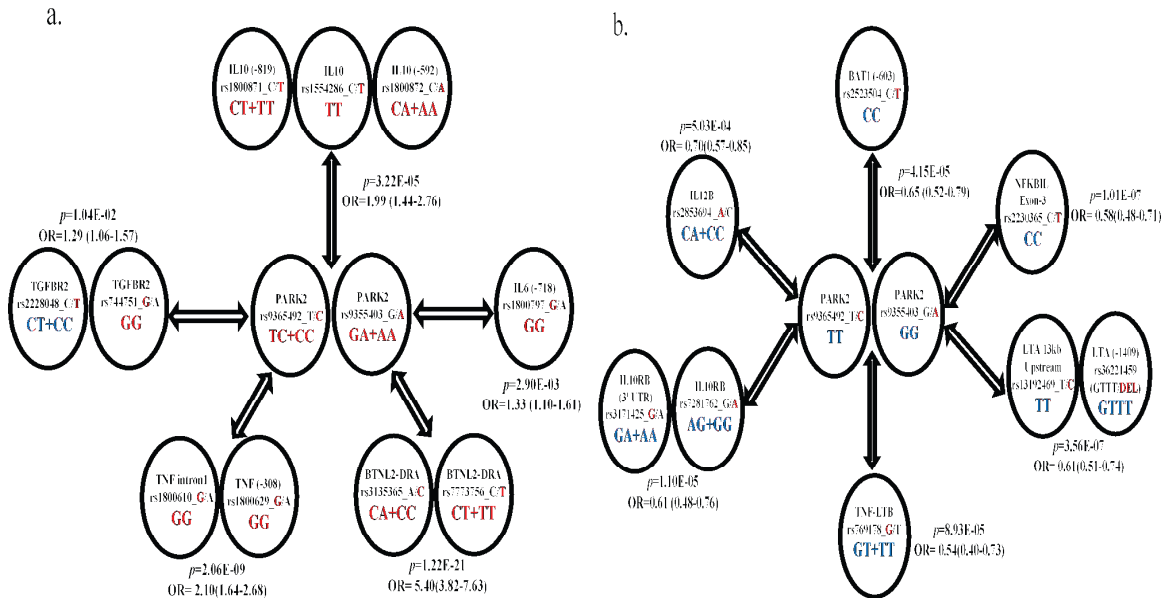

Supplement: bmjopen-2013-004239supp_figure.pdf [file bmjopen-2013-004239supp_figure.pdf]
