# Supplementary material for: PARK2 and proinflammatory/anti-inflammatory cytokine gene interactions contribute to the susceptibility to leprosy: a case–control study of North Indian population
Source: HighWire-hosted journal article supplement (doi:10.1136/bmjopen-2013-004239), 2014-02-01
Supplement: bmjopen-2013-004239supp_table.pdf [file bmjopen-2013-004239supp_table.pdf]

**Table S1:** Pathway analysis of PARK2 interacting protein with Cytokines studied by us in Indian population groups

| PARK2-interacting proteins | Uniport_ID of PARK2 interacting proteins | PATHWAYS involving PARK2 interacting proteins and Cytokine genes | Cytokine genes   | Databases used for Pathways retrieval |
|----------------------------|------------------------------------------|------------------------------------------------------------------|------------------|---------------------------------------|
| CUL1                       | Q13616                                   | Adherens junction                                                | TGFR2            | KEGG                                  |
| VINC                       | P18206                                   | Adherens junction                                                | TGFR2            | KEGG                                  |
| CUL1                       | Q13616                                   | Amyotrophic lateral sclerosis (ALS)                              | TNF              | KEGG                                  |
| NMDE2                      | Q13224                                   | Amyotrophic lateral sclerosis (ALS)                              | TNF              | KEGG                                  |
| CUL1                       | Q13616                                   | Angiopoietin receptor Tie2-mediated signaling                    | TNF              | Nci-Nature                            |
| CASP8                      | Q14790                                   | Apoptosis                                                        | TNF              | KEGG                                  |
| CASP8                      | Q14790                                   | caspase cascade in apoptosis                                     | TNF              | BioCarta                              |
| CASP8                      | Q14790                                   | Caspase cascade in apoptosis                                     | TNF              | Nci-Nature                            |
| CASP1                      | P29466                                   | caspase cascade in apoptosis                                     | TNF              | BioCarta                              |
| CASP1                      | P29466                                   | Caspase cascade in apoptosis                                     | TNF              | Nci-Nature                            |
| CASP1                      | P29466                                   | Cellular roles of Anthrax toxin                                  | TNF              | Nci-Nature                            |
| CASP8                      | Q14790                                   | ceramide signaling pathway                                       | TNF              | BioCarta                              |
| CASP8                      | Q14790                                   | Ceramide signaling pathway                                       | TNF              | Nci-Nature                            |
| CASP8                      | Q14790                                   | Chagas disease                                                   | IL10, TGFR2, TNF | KEGG                                  |
| CUL1                       | Q13616                                   | Fc epsilon RI signaling pathway                                  | TNF              | KEGG                                  |
| CASP8                      | Q14790                                   | hiv-1 nef: negative effector of fas and tnf                      | TNF              | BioCarta                              |
| CASP8                      | Q14790                                   | HIV-1 Nef: Negative effector of Fas and TNF-alpha                | TNF              | Nci-Nature                            |
| CUL1                       | Q13616                                   | IL6-mediated signaling events                                    | IL6              | Nci-Nature                            |
| CUL1                       | Q13616                                   | Integrins in angiogenesis                                        | TGFR2            | Nci-Nature                            |
| CASP8                      | Q14790                                   | Integrins in angiogenesis                                        | TGFR2            | Nci-Nature                            |
| VINC                       | P18206                                   | Integrins in angiogenesis                                        | TGFR2            | Nci-Nature                            |
| CUL1                       | Q13616                                   | LPA receptor mediated events                                     | IL6              | Nci-Nature                            |

|       |        |                                           |                 |            |
|-------|--------|-------------------------------------------|-----------------|------------|
| CUL1  | Q13616 | MAPK signaling pathway                    | TGFR2, TNF      | KEGG       |
| CUL1  | Q13616 | Natural killer cell mediated cytotoxicity | TNF             | KEGG       |
| RBP2  | P49792 | Signaling events mediated by HDAC Class I | TNF             | Nci-Nature |
| CSKP  | O14936 | Syndecan-1-mediated signaling events      | TGFR2           | Nci-Nature |
| KCC2A | Q9UQM7 | TGF-beta receptor signaling               | TGFR2           | Nci-Nature |
| CUL1  | Q13616 | TGF-beta signaling pathway                | TGFR2, TNF      | KEGG       |
| CASP8 | Q14790 | TNF receptor signaling pathway            | TNF             | Nci-Nature |
| CASP8 | Q14790 | TNF signaling                             | TNF             | Reactome   |
| CASP8 | Q14790 | tnfr1 signaling pathway                   | TNF             | BioCarta   |
| CUL1  | Q13616 | Toll-like receptor signaling pathway      | IL6, TNF, IL12B | KEGG       |
| CASP8 | Q14790 | Toll-like receptor signaling pathway      | IL6, TNF, IL12B | KEGG       |
